# 1 **A projection specific logic to sampling visual inputs in mouse superior colliculus**

2 Katja Reinhard<sup>1,2,3,\*</sup>, Chen Li<sup>1,2,\*</sup>, Quan Do<sup>1,5</sup>, Emily Burke<sup>1,5</sup>, Steven Heynderickx<sup>1,4</sup> and Karl Farrow<sup>1,</sup>  
3 2,3,4

4 <sup>1</sup>Neuro-Electronics Research Flanders, Leuven, 3001, Belgium.

5 <sup>2</sup>Department of Biology, KU Leuven, Leuven, 3001, Belgium.

6 <sup>3</sup>VIB, Leuven, 3001, Belgium.

7 <sup>4</sup>IMEC, Leuven, 3001 Belgium.

8 <sup>5</sup>Northeastern University, Boston, MA 02115, USA

9 \* Equal contribution

## 10 **Abstract**

11 Using sensory information to trigger different behaviours relies on circuits that pass-through brain  
12 regions. However, the rules by which parallel inputs are routed to different downstream targets is poorly  
13 understood. The superior colliculus mediates a set of innate behaviours, receiving input from ~30 retinal  
14 ganglion cell types and projecting to behaviourally important targets including the pulvinar and  
15 parabigeminal nucleus. Combining transsynaptic circuit tracing with *in-vivo* and *ex-vivo*  
16 electrophysiological recordings we observed a projection specific logic where each collicular output  
17 pathway sampled a distinct set of retinal inputs. Neurons projecting to the pulvinar or parabigeminal  
18 nucleus uniquely sampled 4 and 7 cell types, respectively. Four others innervated both pathways. The  
19 visual response properties of retinal ganglion cells correlated well with those of their disynaptic targets.  
20 These findings suggest that projection specific sampling of retinal inputs forms a mechanistic basis for the  
21 selective triggering of visually guided behaviours by the superior colliculus.

22

23

## 24 **Introduction**

25 The nervous system is built from a large set of diverse neuronal cell types that work together to process  
26 information and generate behavior (Zeng and Sanes, 2017). Sets of connected neurons can be divided up  
27 into “hard-wired” circuits that enable robust, stereotyped, reflex-like behavioral responses (Chen et al.,  
28 2011; Lorente de No, 1933; Lundberg, 1979), and flexible networks that modify their computations based  
29 on context and experience (Dhawale et al., 2017; Rose et al., 2016). Many innate behaviors rely on  
30 subcortical circuits involving the same sets of brain structures in different species (Aponte et al., 2011;  
31 Gandhi and Katnani, 2011; Hong et al., 2018; Tinbergen, 1951). In the visual system it remains unclear to  
32 what extent these circuits have hard-wired rules linking their inputs with downstream targets (Cruz-  
33 Martín et al., 2014; Ellis et al., 2016; Gale and Murphy, 2014, 2018; Glickfeld et al., 2013; Liang et al.,  
34 2018; Morgan et al., 2016; Rompani et al., 2017).

35 The output of the retina, the first stage of visual processing, consists of over 30 different ganglion cell  
36 types which can be distinguished by their dendritic anatomy, response properties, or molecular markers  
37 (Baden et al., 2016; Dhande et al., 2015; Farrow and Masland, 2011; Martersteck et al., 2017; Roska and  
38 Werblin, 2001; Sanes and Masland, 2014). Each ganglion cell type informs one or several brain areas  
39 about a certain feature of the visual world (Ellis et al., 2016; Martersteck et al., 2017). One of the major  
40 retinorecipient areas is the superior colliculus, which receives approximately 85% of the retinal outputs in  
41 rodents (Ellis et al., 2016; Hofbauer and Dräger, 1985; Linden and Perry, 1983; Vaney et al., 1981).

42 The rodent superior colliculus is a layered brain structure that receives inputs from all sensory modalities  
43 and targets various nuclei of the midbrain and brainstem. The superficial gray and the optic layer form the  
44 most dorsal layers of the superior colliculus and are primarily innervated by the retina (May, 2006). These  
45 visual layers consist of several groups of neurons with diverse morphology, visual response properties and  
46 long-range targets that include the lateral pulvinar, lateral geniculate nucleus and parabigeminal nucleus.  
47 Each neuron of the superficial superior colliculus has been estimated to receive input from on average six  
48 retinal ganglion cells (Chandrasekaran et al., 2007). However, the different ganglion cell types that  
49 provide input to specific superior collicular output pathways have not been characterized. As a result, it is  
50 unknown whether each output pathway of the superior colliculus shares a common or different set of  
51 retinal inputs, and consequently whether different visual inputs give rise to the different behaviors  
52 initiated by the colliculus (Evans et al., 2018; Shang et al., 2015, 2018; Wei et al., 2015; Zhang et al.,  
53 2019).

54 To determine the wiring rules underlying the integration of retinal information by different output  
55 pathways of the superior colliculus, we used a combination of transsynaptic viral tracing and molecular  
56 markers to specifically label the retinal ganglion cells at the beginning of two circuits: one targeting the  
57 parabigeminal nucleus (colliculo-parabigeminal circuit) and the second targeting the pulvinar (colliculo-  
58 pulvinar circuit). Using quantitative analysis of the retinal ganglion cell morphology and comparison of  
59 the visual response properties in the retina and target nuclei, we found strong specificity in the routing of  
60 visual information through the superior colliculus.

61

## 62 **Results**

### 63 **Transsynaptic tracing of retinal ganglion cells from targets of the superior colliculus**

64 To determine if visual features are selectively sampled by the two targeted output pathways of the mouse  
65 superior colliculus, we used rabies-based viral tools to label retinal ganglion cells innervating either the  
66 colliculo-parabigeminal or colliculo-pulvinar circuit. We injected the parabigeminal nucleus (Figure 1A-  
67 C) or lateral pulvinar (Figure S1A-C) with herpes-simplex virus (HSV) expressing rabies-G, TVA and  
68 mCherry, and subsequently injected EnvA-coated rabies virus coding for GCaMP6s (EnvA-SADΔG-  
69 GCaMP6s) into the superficial layers of the superior colliculus (see Methods). This transsynaptic viral  
70 infection strategy resulted in the expression of GCaMP6s in several dozen retinal ganglion cells per retina  
71 that specifically innervate the targeted circuit. As the lateral pulvinar lies adjacent to the lateral geniculate  
72 we used the Ntsr1-GN209-Cre mouse line to ensure specific infection of neurons projecting to the lateral  
73 pulvinar (Gale and Murphy, 2014).

74 The anatomy of labelled ganglion cells was recovered by staining the retinas with antibodies against GFP  
75 (binding to the GCaMP6s) and ChAT, an internal marker of depth formed by starburst amacrine cells  
76 (Sanes and Masland, 2014; Sümbül et al., 2014). We created high-resolution confocal image stacks of  
77 each ganglion cell (X, Y, Z: 0.38, 0.38, 0.25-0.35  $\mu\text{m}/\text{pixel}$ ). Applying a semi-automated image  
78 processing routine, we created a flattened version of each ganglion cell relative to the ChAT bands that  
79 enables a precise quantification of their dendritic morphology (Sumbul et al., 2014; Sümbül et al., 2014).

### 80 **Anatomy of retinal inputs to the colliculo-parabigeminal and the colliculo-pulvinar circuit**

81 The morphology of 301 ganglion cells innervating the colliculo-parabigeminal ( $n = 146$ ) and colliculo-  
82 pulvinar ( $n = 155$ ) circuit were extracted. The cells showed a variety of morphologies:  $\sim 10\%$  had  
83 bistratified dendritic trees ( $n = 31$ );  $\sim 20\%$  were mono-stratified with dendrites below the ChAT-bands ( $n$   
84  $= 60$ );  $\sim 41\%$  had their dendrites restricted to the region between the ChAT-bands ( $n = 124$ ); and  $\sim 29\%$   
85 had dendrites stratifying exclusively above the ChAT-bands ( $n = 86$ ; Figure 1D). We calculated for each  
86 cell the area covered by the dendrites and created a depth profile of the dendritic tree relative to the ChAT  
87 bands (Figure S1J). Our dataset contains cells with dendritic field diameters ranging from 90 to 420  $\mu\text{m}$   
88 (median: 206  $\mu\text{m}$ ), similar to the reported range of 80 to 530  $\mu\text{m}$  (Badea and Nathans, 2004; Bae et al.,  
89 2018; Coombs et al., 2006; Kong et al., 2005; Sun et al., 2002).

90 Comparing the size and stratification of retinal ganglion cells innervating the colliculo-parabigeminal and  
91 colliculo-pulvinar circuits revealed two basic trends. First, cells innervating the colliculo-parabigeminal  
92 circuit had larger dendritic trees (median: 232  $\mu\text{m}$ ) than the cells innervating the colliculo-pulvinar circuit  
93 (median: 186  $\mu\text{m}$ ;  $p < .01$ , Kolmogorov-Smirnov test; Figure 1E). This was true at each stratification level  
94 (below ChAT-bands: 280  $\mu\text{m}$  (parabigeminal) vs 183  $\mu\text{m}$  (pulvinar); between ChAT-bands: 185  $\mu\text{m}$  vs  
95 130  $\mu\text{m}$ ; above ChAT-bands: 234  $\mu\text{m}$  vs 170  $\mu\text{m}$ ; Figure 1F). Second, the stratification depth of cells  
96 innervating each circuit had distinct distributions. While the colliculo-pulvinar circuit showed strong bias  
97 for sampling from neurons stratifying between (50.3%) and above (32.9%) the ChAT-bands, the colliculo-  
98 parabigeminal circuit sampled more evenly from each stratification level (bistratified 18.5%, below  
99 ChAT-bands 26.0%, between 31.5%, above 24.0%; Figure 1G). We found that these differences are not  
100 due to a bias in the retinotopic location of the sampled cells (Figure S1K-M).

101

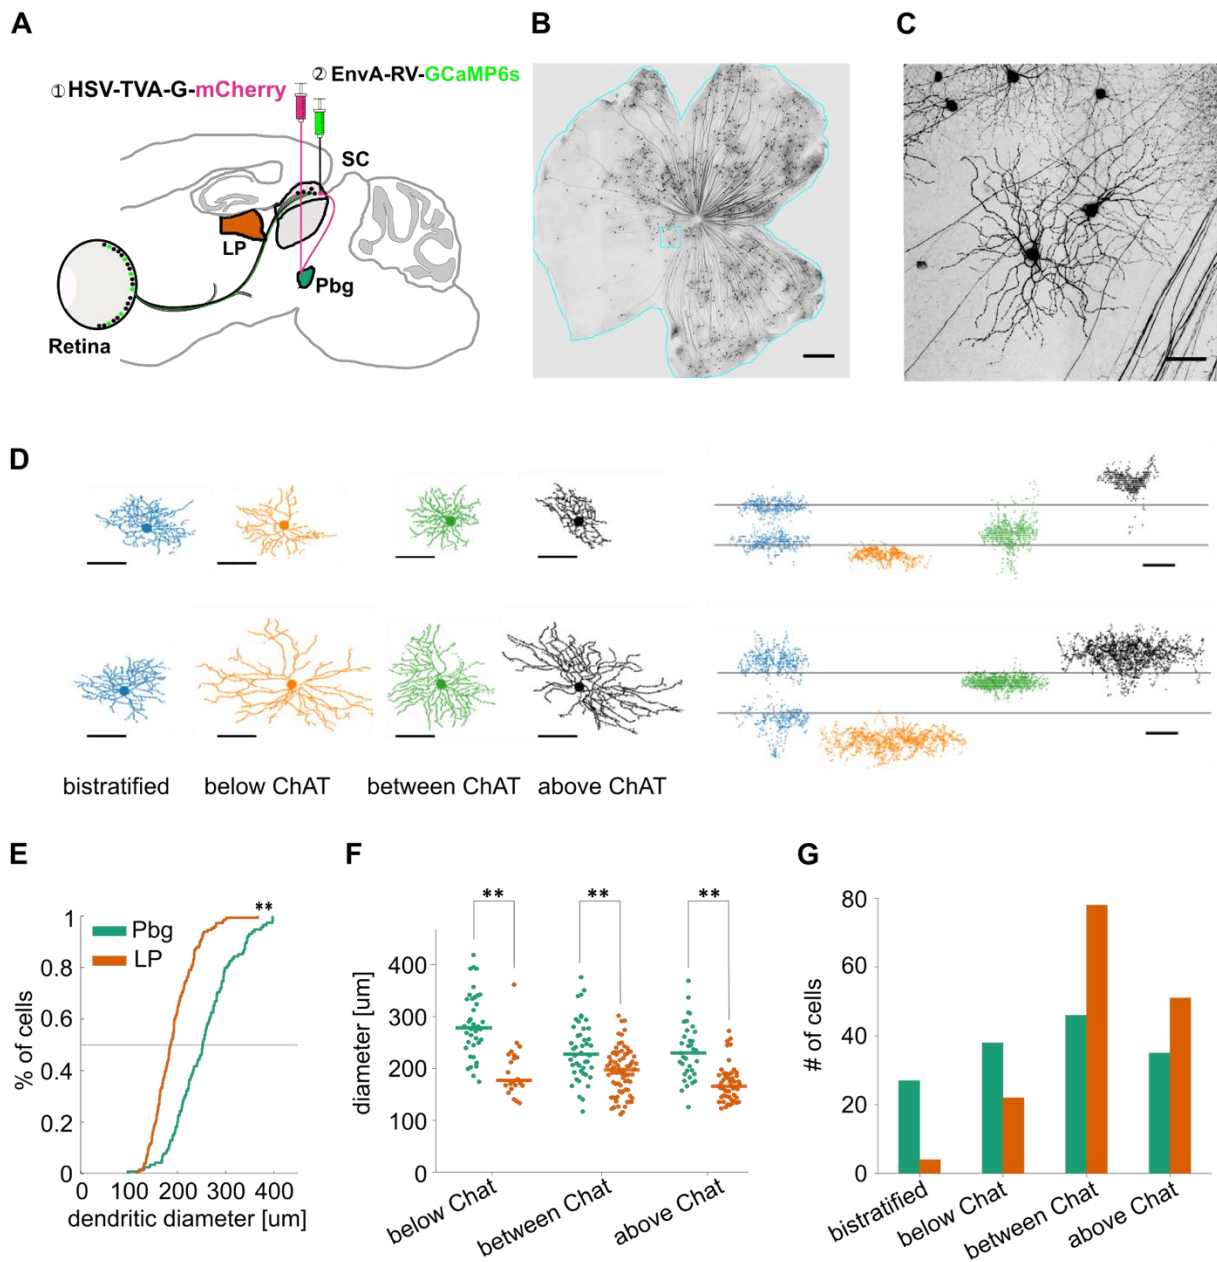

**Figure 1. Transsynaptic tracing of retinal ganglion cells from the parabigeminal nucleus and the lateral pulvinar. A-C)** Labelling of the inputs to the colliculo-parabigeminal circuit. **A)** Injection strategy for labelling of the circuit connecting the retina to the parabigeminal nucleus, via the superior colliculus. **B)** Example retina with labelled ganglion cells innervating the colliculo-parabigeminal circuit. Scale bar = 500  $\mu\text{m}$ . **C)** Zoomed-in version of C. Scale bar = 50  $\mu\text{m}$ . **D)** 8 example retinal ganglion cells from either injection approach (parabigeminal nucleus or pulvinar). Left: en-face view of the dendritic tree. Right: side-view of the dendritic tree. Location of ChAT-bands is indicated with two grey lines. The cells have been broadly separated into four stratification groups: bistratified (first column), below ChAT-bands (second column), between ChAT-bands (third column), and above ChAT-bands (last column). **E)** Distribution of dendritic tree diameter of retinal ganglion cells that are part of the colliculo-pulvinar (LP; orange) and the colliculo-parabigeminal nucleus (Pbg; green) circuit. **\*\*** $p < .01$  Kolmogorov-Smirnov test. **F)** Retinal ganglion cell diameters for cells stratifying below, between, and above ChAT-bands. **G)** Retinal ganglion cells of each circuit were grouped into four stratification groups based on the peak of their dendritic profile. **\*\*** $p < .01$  Kolmogorov-Smirnov test and Wilcoxon rank sum test. See also Figure S1.

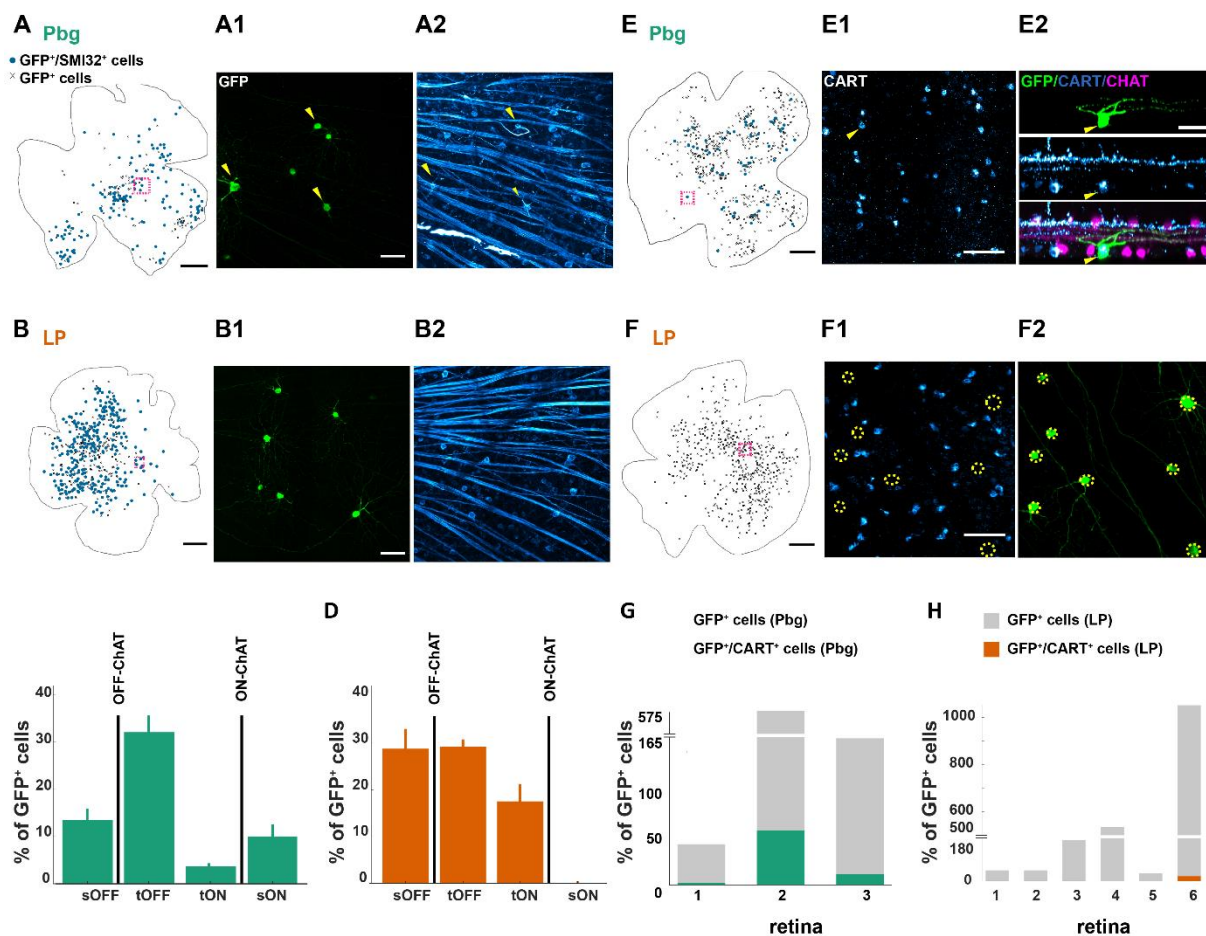

**Figure 2: Distinct projection patterns of molecularly labelled retinal ganglion cells.** **A-D)** Alpha retinal ganglion cells sending information to the colliculo-parabigeminal circuit. **A-B)** Example retina with SMI32-positive labelled retinal ganglion cells and examples of SMI32 positive neurons innervating the colliculo-parabigeminal and colliculo-pulvinar circuit, respectively. **A)** Example retina with SMI32-positive labelled retinal ganglion cells (blue dots) and SMI32-negative labelled retinal ganglion cells (other ganglion cells labelled after parabigeminal injections; black crosses). **A1)** Histological staining against GCaMP6s. Yellow arrows indicate SMI32-positive cells. **A2)** SMI32 histological staining against neurofilament. **C-D)** Median percentage of the four different alpha ganglion cell types (100% corresponds to all GCaMP6s-expressing cells). Colliculo-parabigeminal circuit n = 91 cells from 3 retinas. Bars indicate standard errors. Colliculo-pulvinar circuit n = 90 cells from 3 retinas. **E-H)** ON-OFF direction-selective cells labelled with CART. **E)** Example retina with CART-positive (dots) and CART-negative (crosses) labelled retinal ganglion cells. The arrow indicates a double-labelled cell (GFP signal not shown). **E2)** Side-view of the cell labelled in E1. The cell has been labelled by the rabies virus (GFP-positive; top) and is CART-positive (middle). Bottom: overlay of GFP, CART, and ChAT-staining. **F)** No CART<sup>+</sup> neurons were labelled in pulvinar experiments. **G)** Number of CART<sup>+</sup>-cells in all 3 retinas of colliculo-parabigeminal circuit. **H)** Numbers of ON-OFF direction-selective cells are negligible in the colliculo-pulvinar circuit. Scale bar = 500  $\mu$ m (A, B, E, F), scale bar = 50  $\mu$ m (A1, A2, B1, B2, E1, E2, F1, F2).

## 104 **Retinal inputs to the parabigeminal and the pulvinar circuit differ in molecular signature**

105 To determine if the observed anatomical differences are reflected in the identity of the retinal ganglion  
106 cells, we performed histological staining against molecular markers of ganglion cell types. First, the four  
107 alpha cell types were labelled using SMI32-antibody against neurofilament (Bleckert et al., 2014;  
108 Coombs et al., 2006; Huberman et al., 2008; Krieger et al., 2017; Peichl et al., 1987). We found that  
109 around half of all rabies-labelled cells innervating the two circuits are alpha-cells (colliculo-parabigeminal  
110 median: 42%, n = 3 retinas; colliculo-pulvinar median: 53%, n = 4 retinas; Figure 2). The four classes of  
111 alpha-cells in mice can be distinguished based on stratification depth: sustained ON-alpha cells have  
112 dendrites below the ChAT-bands; the transient ON- and transient OFF-alpha cells have dendrites between  
113 the ChAT-bands, and the sustained OFF-alpha cell has dendrites above the ChAT-bands (Krieger et al.,  
114 2017). To identify which of the four alpha cell types are part of each circuit, we acquired local z-stacks of  
115 SMI32<sup>+</sup>/GCaMP6s<sup>+</sup> double labelled neurons (n = 91 cells in 3 mice for the colliculo-parabigeminal  
116 circuit; n = 90 cells in 3 mice for the colliculo-pulvinar circuit). Each neuron was manually classified  
117 based on dendritic stratification depth (Figure 2C and D). Both circuits sample from sustained and  
118 transient OFF-alpha cells (parabigeminal vs pulvinar median: 13% vs 20% sustained; 32% vs 29%  
119 transient OFF-cells; 100% corresponds to all GFP<sup>+</sup> cells). In contrast, transient ON-cells mostly innervate  
120 the colliculo-pulvinar circuit (parabigeminal vs pulvinar median: 4% vs 17%), while sustained ON-cells  
121 are almost exclusively labelled in the parabigeminal experiments (parabigeminal vs pulvinar median: 10%  
122 vs 0%).

123 In our dataset, the bistratified cells with dendritic density peaks aligned with the two ChAT-bands  
124 strongly resemble the morphology of ON-OFF direction-selective cells (Sanes and Masland, 2014). In the  
125 mouse retina, there are four types of ON-OFF direction-selective ganglion cells, each responding to one  
126 of the four cardinal directions. Three of the four types can be labelled with anti-CART antibodies (Dhande  
127 et al., 2013). We performed anti-CART histological staining in a subset of the retinas (Figure 2E-F).  
128 Double labelled neurons (GCaMP6s<sup>+</sup> and CART<sup>+</sup>) are found almost exclusively after retrograde tracing  
129 from the parabigeminal nucleus (Figure 2G; median: 6.9% of all GCaMP6s-positive cells, range: 4.3 to  
130 9.1%, n = 3 retinas). In the pulvinar experiments, a negligible percentage of the labelled ganglion cells are  
131 CART<sup>+</sup> (Figure 2H; median: 1.3%, range: 0 to 2.1%, n = 6 retinas). In two of these retinas we saw no  
132 double labelled neurons (0/34 and 0/536).

## 133 **Clustering of ganglion cell anatomy reveals selective sampling by the colliculo-parabigeminal** 134 **and the colliculo-pulvinar circuit**

135 To get an estimate of the number of cell types innervating the colliculo-pulvinar and colliculo-  
136 parabigeminal circuits, we clustered our morphological data taking into consideration information about  
137 molecular identity (54/301 ganglion cells; n = 51 were SMI32<sup>+</sup>; n = 3 were CART<sup>+</sup>). We first set the  
138 average dendritic stratification profile for each molecularly identified cell type as a cluster centroid (4  
139 SMI32<sup>+</sup> types and 1 CART<sup>+</sup> group). Then, all cells were clustered using affinity-propagation (Frey and  
140 Dueck, 2007). Our best estimate for the number of clusters was 12 based on three validation indices  
141 (Figure S3A-B). Dendritic tree location and size variance was consistent with previously published  
142 measurements, suggesting that our clustering result represented individual retinal ganglion cell types  
143 (Figure S3C-H). Within these 12 anatomical clusters, we found three distinct groups of cell types: 6  
144 clusters that primarily innervate the parabigeminal circuit, 3 clusters that are almost exclusively part of  
145 the pulvinar circuits, and 3 clusters that innervate both circuits. Taken together, the colliculo-pulvinar and  
146 the colliculo-parabigeminal circuits sample from a small and only partially overlapping set of retinal  
147 ganglion cell types (Figure 3).

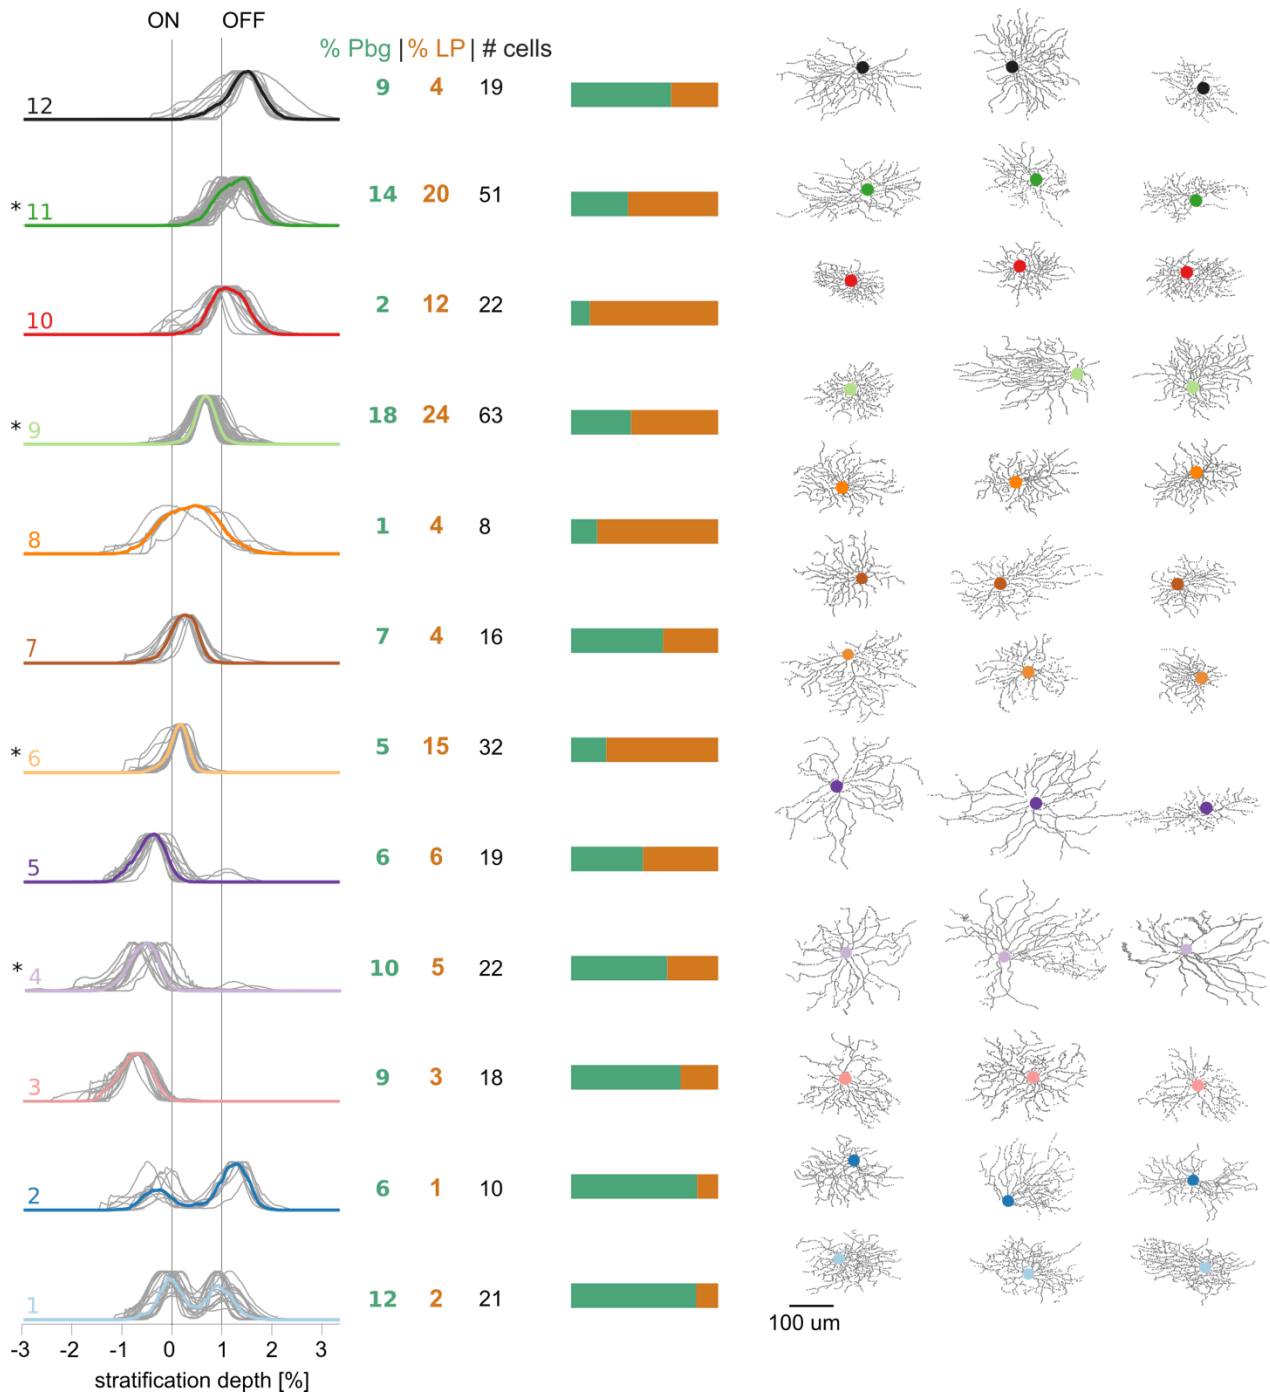

**Figure 3: Retinal ganglion cell types targeting paravigeminal- and pulvinar-projecting collicular neurons.** 12 clusters resulting from affinity propagation clustering based on the morphology and molecular markers of 301 retinal ganglion cells. Left: dendritic stratification profiles (median in colour). Profiles for individual cells are plotted in grey. Numbers indicate percentages of ganglion cells in a given cluster that were labelled after paravigeminal nucleus or pulvinar injections and the total number of cells in each cluster. Bars show proportion of cells in each cluster from paravigeminal (green) and pulvinar experiments (orange). \* Indicates clusters with SMI32-positive cells. Right: en-face view of 3 example cells for each cluster that are the most similar to the cluster median. See also Figure S2.

149 The clusters specifically innervating the colliculo-parabigeminal circuit (cluster 1, 2, 3, 4, 7, and 12)  
150 include six putative types. These clusters included bistratified types: Cluster 1 contains the CART<sup>+</sup> cells  
151 that have small dendritic fields with two dendritic layers that co-stratify with the ChAT-bands (n = 21;  
152 median diameter: 198 μm). These ganglion cells are the ON-OFF direction selective cell (Sanes and  
153 Masland, 2014). In cluster 2 we find a second bistratified cell type with a larger dendritic tree that  
154 stratifies below and above the ChAT-bands (n = 10; median diameter: 214 μm). Two clusters contain ON-  
155 neurons with dendrites below the ON-ChAT-band. One of the ON-types (cluster 4) contains SMI32<sup>+</sup> cells  
156 (n = 22; median diameter: 276 μm), and has a morphology similar to sustained ON-alpha cells (Bleckert  
157 et al., 2014; Krieger et al., 2017). The very strong bias of this cluster for the colliculo-parabigeminal  
158 circuits mimics our antibody-labelling results of SMI32<sup>+</sup> cells (Figure 2C and D). The second ON-type  
159 (cluster 3) does not contain SMI32<sup>+</sup> cells, its dendrites lie further away from the ON-ChAT-band and it  
160 has a smaller dendritic tree (n = 18; median diameter: 232 μm). A single cluster (cluster 7) has neurons  
161 with dendrites between the ChAT-bands. These cells have relatively small dendritic trees that are located  
162 closer to the ON-ChAT band (n = 16; median diameter: 185 μm). The last cell type that specifically  
163 targets the colliculo-parabigeminal circuits consists of relatively large OFF-cells with a dendritic tree far  
164 above the OFF-ChAT-band (cluster 12, n = 19; median diameter: 243 μm).

165 The three ganglion cell types sending information preferentially to the colliculo-pulvinar circuit are in  
166 cluster 6, 8, and 10 and do not include any bistratified cells. The dendritic trees of the cells in cluster 6 are  
167 just above the ON-ChAT-band and this cluster contains SMI32<sup>+</sup> neurons (n = 32; median diameter: 176  
168 μm), which resemble the transient ON-alpha cell (Krieger et al., 2017). The selective routing of this type  
169 to the colliculo-pulvinar circuit is consistent with the molecular labelling experiments where transient  
170 ON-alpha cells are mostly labelled after pulvinar injections (Figure 2C and D). The cells in cluster 8 have  
171 an exceptionally broad dendritic tree and small dendritic fields (n = 8; median diameter: 199 μm). The  
172 third type of ganglion cells that uniquely targets the colliculo-pulvinar circuit is a rather small OFF-type  
173 with dendrites just above the OFF-ChAT-band (cluster 10, n = 22; median diameter: 166 μm).

174 Finally, three clusters innervate both circuits (cluster 5, 9 and 11). An ON-type (cluster 5) located just  
175 below the ON-ChAT-band has a sparse dendritic tree (n = 19; median diameter: 249 μm). Cluster 9  
176 contains SMI32<sup>+</sup> cells (n = 63; median diameter: 230 μm) with relatively large dendritic trees just below  
177 the OFF-ChAT-band that resemble the morphology of transient OFF-alpha cells (Huberman et al., 2008;  
178 Krieger et al., 2017; Münch et al., 2009). SMI32<sup>+</sup> cells can also be found in cluster 11 (n = 51; median  
179 diameter: 187 μm). These OFF-cells have dendrites above the OFF-ChAT-band and are smaller in size,  
180 comparable to the published morphology of sustained OFF-cells (Bleckert et al., 2014; Farrow et al.,  
181 2013; Krieger et al., 2017). These results are consistent with our analysis of SMI32<sup>+</sup> neurons (Figure 2C  
182 and D) where we found that both transient and sustained OFF-cells are labelled after parabigeminal and  
183 pulvinar injections.

#### 184 **Functional classes of retina ganglion cells show refined pathway selectivity**

185 We next characterized the functional response properties of the retinal ganglion cells innervating the  
186 colliculo-pulvinar and colliculo-parabigeminal circuits. To accomplish this, we performed two-photon  
187 targeted patch-clamp recordings from transsynaptically labelled neurons (Figure 4 and Figure S4). We  
188 presented each neuron with two sets of stimuli, one to determine its type (Figure 4) and a second to  
189 determine its responses to behaviourally relevant stimuli (Figure 7). We recorded from a total of 87  
190 neurons, 47 innervating the colliculo-pulvinar circuit and 40 innervating the colliculo-parabigeminal  
191 circuit.



192

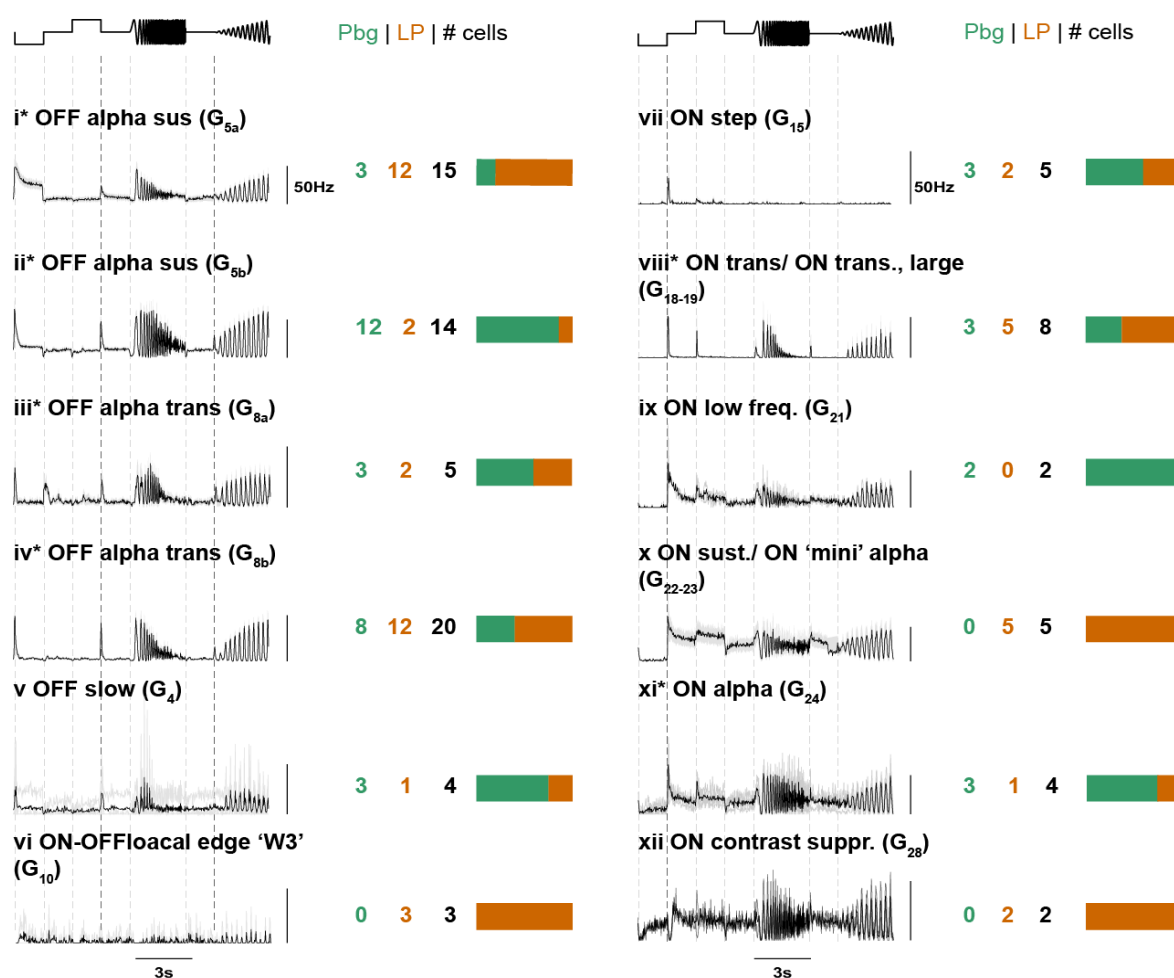

**Figure 4. Functional response properties of labelled retinal ganglion cells.** Average firing rate response (bin size 50 ms) of the labelled retinal ganglion cells to a full-field “chirp” stimulus. Mean response in black, standard error of the mean or the response of each cell in this group (if  $n < 5$ ) in grey. Numbers of recorded cells per circuit and group are indicated. Bar plots show the proportion of cells from either parabigeminal nucleus or pulvinar experiments in each group. \* Indicates groups that include SMI32-positive cells.

193 To determine the functional class of each recorded cell we identified the best match group based on its  
194 response to a full-field stimulus (“chirp”) that Baden et al., 2016 previously used to classify retinal  
195 ganglion cells (hence referred to as  $G_{xx}$ , Baden et al., 2016). In addition, a moving bar was presented to  
196 estimate each neurons direction and orientation tuning (Figure S4). In our recordings we identified 12  
197 functional groups, where each functional group is consistent with the predicted responses of one of the  
198 anatomical clusters shown in Figure 3 (see Table S1). The functional groups included all alpha ganglion  
199 cells. However, we found response properties that separated the OFF alpha neurons into separate groups.  
200 Specifically, sustained OFF and transient OFF alpha ganglion cells each show two distinct response  
201 characteristics to the “chirp” stimulus that suggest that these anatomical classes form separate functional  
202 groups. The sustained OFF alpha neurons ( $G_5$  in Baden et al. 2016) could be split into two clear  
203 functional classes equivalent to  $G_{5a}$  and  $G_{5b}$ , group *i* and *ii* respectively (Figure 4). The transient OFF  
204 alpha neurons could also be separated into two groups equivalent to  $G_{8a}$  and  $G_{8b}$ , group *iii* and *iv*,  
205 respectively. Based on SMI32 staining and cell body size, sustained ON alpha neurons ( $G_{24}$ ; group *x*;  
206 median cell body size  $195 \mu\text{m}^2$ ) could be distinguished from other sustained ON cells ( $G_{22/23}$ ; group *xi*;  
207 median cell body size  $133 \mu\text{m}^2$ ). In addition, we identified transient ON alpha neurons ( $G_{18/19}$ ; group *viii*),  
208 ON contrast suppressed neurons ( $G_{28}$ ; group *xii*), ON low frequency neurons ( $G_{21}$ ; group *ix*), ON step  
209 neurons ( $G_{15}$ ; group *vii*), ON-OFF local-edge ‘W3’ ( $G_{10/14}$ ; group *vi*) and OFF slow neurons ( $G_4$ ; group *v*).  
210 No recordings were made from direction-selective neurons as expected from our positive antibody  
211 staining for CART and bistratified anatomy inline with the ChAT bands (Figure 2 and 3).

212 We next asked whether the functional classes of retinal ganglion cells selectively innervate the colliculo-  
213 pulvinar or colliculo-parabigeminal pathways. In general, our functional recordings confirmed the  
214 pathway specific selectivity we observed in the molecular and anatomical analysis (Figure 2 and 3).  
215 Specifically, sustained ON alpha ganglion cells innervate the colliculo-parabigeminal pathway (group *xi*  
216 and Cluster 4); transient OFF alpha cells innervate both pathways (group *iii and iv* and Cluster 9); and  
217 local edge detectors (group *vi* and Cluster 8) selectively innervate the colliculo-pulvinar circuit. The  
218 putative ON low frequency (group *x* and Cluster 3) and putative OFF slow cells (group *v* and Cluster 12)  
219 preferentially innervate the colliculo-parabigeminal circuit. In addition, our functional recordings  
220 provided a more refined point of view of the selectivity for one of the putative cell classes. Specifically,  
221 the sustained OFF alpha ganglion cells (group *i* and *ii*, and Cluster 11), showed clear pathway specificity  
222 based on their functional response characteristics, which was not observed in the cluster based on  
223 molecular and anatomical data. We found group *i* ( $G_{5a}$ ) and group *ii* ( $G_{5b}$ ) innervated the colliculo-  
224 pulvinar and colliculo-parabigeminal circuit, respectively.

### 225 **Visual response properties of neurons in the pulvinar and parabigeminal nucleus**

226 To test if the selective sampling of retinal inputs was reflected in the visual responses of the collicular  
227 targets, we performed multichannel silicon probe recordings in awake, head-fixed mice (Figure 5). In  
228 each recording session, stereotaxic coordinates were used to target the parabigeminal nucleus or pulvinar,  
229 the location of the probe was confirmed using histology and fluorescent dyes (Figure 5B and Methods).  
230 We recorded the brain activity on 384 electrodes spanning  $\sim 3800 \mu\text{m}$  in depth during visual stimulation  
231 (Figure 5C) and extracted the spikes for single units (Figure 5D). Both brain nuclei responded reliably to  
232 a set of visual stimuli including big-fast and small-fast objects as well as expanding dots (Figure 5E).  
233 However, the percentages of responding units differed for the different stimuli between the parabigeminal  
234 nucleus and the pulvinar (Figure 5F).

235

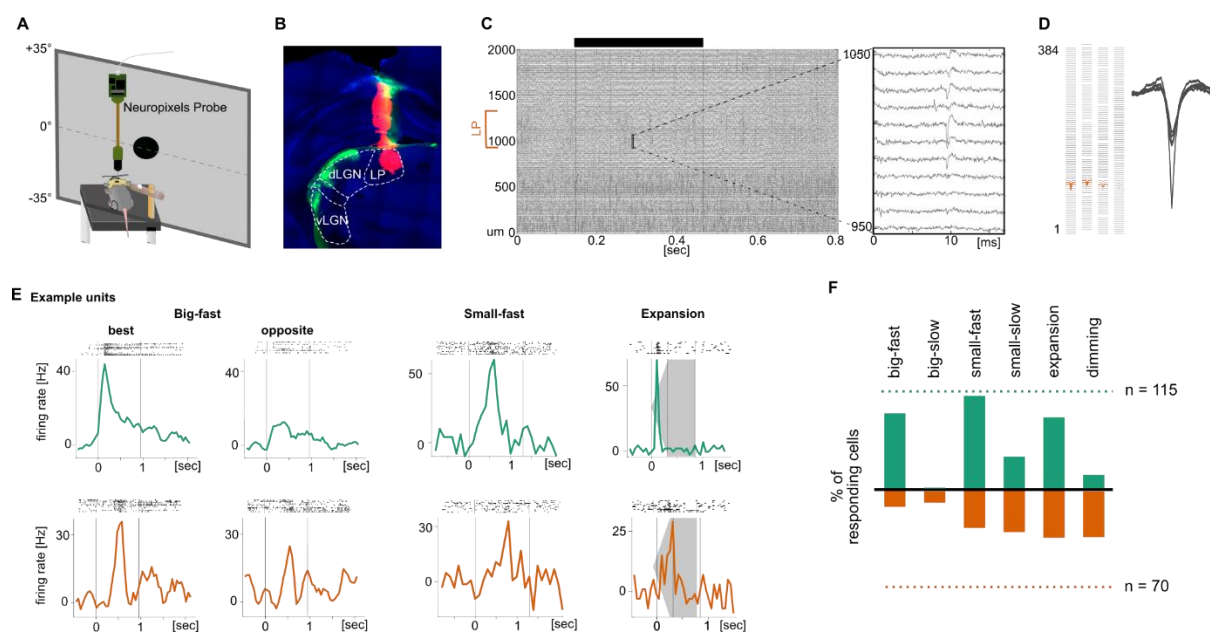

**Figure 5: Recordings from the parabigeminal nucleus and pulvinar *in-vivo*.** **A**) Scheme of setup for Neuropixels recordings in awake, head-fixed mice. **B**) Track of DiD-coated probe (magenta) visible in the pulvinar. Retina targets, including the LGN, were labelled using Cholera toxin-b-Alexa488 injections into the eye (green). **C**) Example raw trace on 201 out of 384 electrodes during the presentation of an expanding dot. The stimulus beginning and end are indicated with a black bar. The part of the probe covering the pulvinar is labelled. Right: 13 ms long snippet showing spiking activity on 10 electrodes. **D**) Foot print of a single neuron shown on the 384 electrodes and its 5 biggest template waveforms. **E**) Example responses from Pbg and pulvinar recordings to 10 repetitions of different stimuli. Stimuli were: Big-fast black square (53° side length, moving at 150°/sec); small- fast black dot (4° diameter, moving at 150°/sec); expanding black dot (expanded from 2° to 50° of diameter within 300 ms). The vertical lines indicate the stimulus beginning and end. **F**) Percentage of responding Pbg (green) and pulvinar (orange) units for four tested visual stimuli. 100% corresponds to the total number of light responsive units.

237

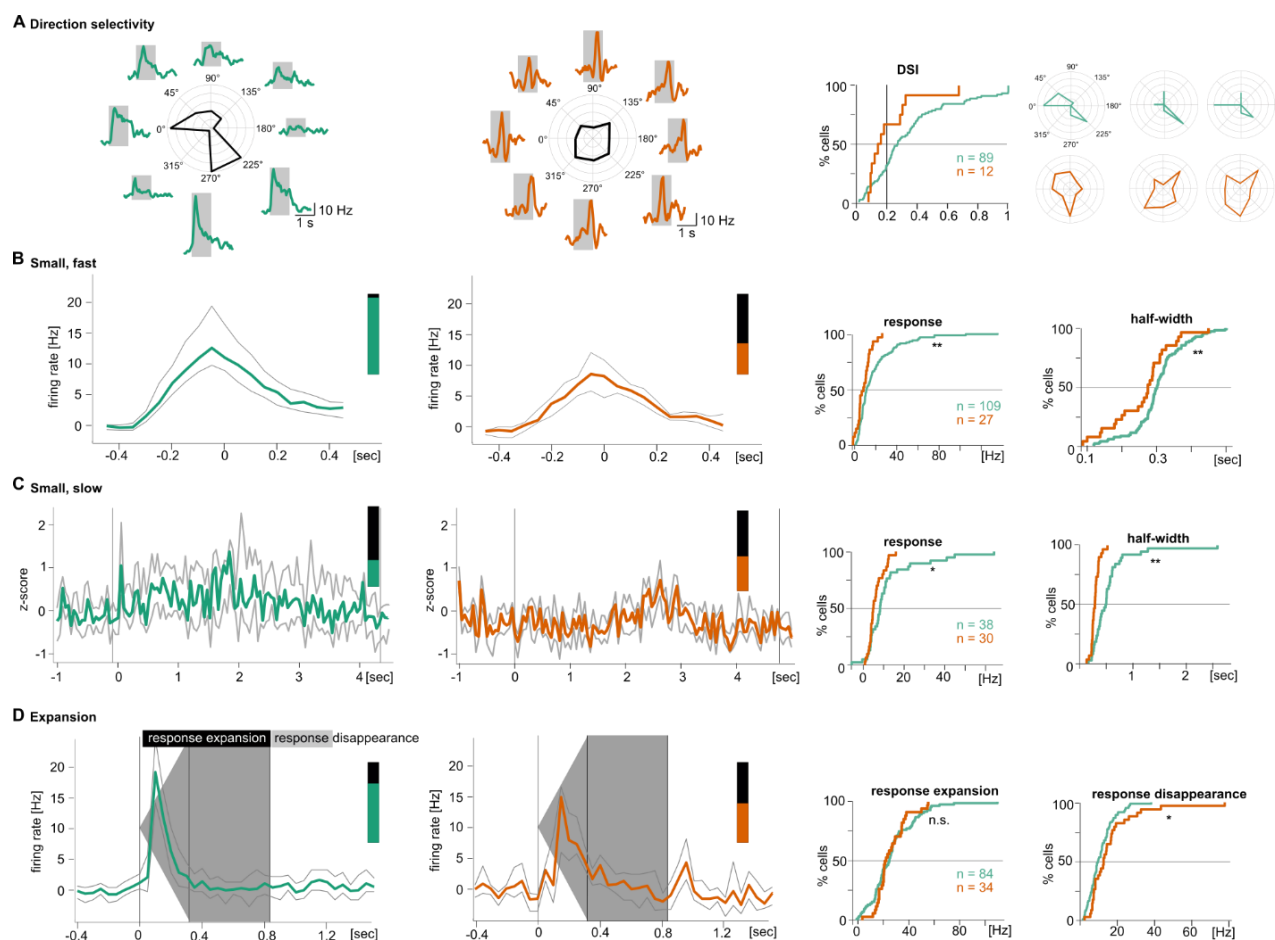

**Figure 6: Neurons in the parabigeminal nucleus and pulvinar prefer different sets of visual stimuli. A)** Direction selectivity was measured with a big-fast black square moving in 8 directions ( $53^\circ$  side length, moving at  $150^\circ/\text{sec}$ ). Left: Pbg example unit responding preferentially to a stimulus moving to the front and to stimuli moving to the back/down. Middle: Pulvinar example unit without direction preference. Right: Distribution of direction-selectivity indices (DSI) and three example cells with a DSI around the population average. **B)** Median  $\pm$  octiles of peak response of all Pbg units (left;  $n = 109$  out of 115 Pbg units with light responses) and all LP units (middle;  $n = 27$  out of 70 LP units with light responses) to a small-fast dot ( $4^\circ$  diameter, moving at  $150^\circ/\text{sec}$ ). Right: cumulative distribution of maximal response amplitude and half-width. **C)** Median  $\pm$  octiles of responses to a small-slow dot ( $4^\circ$  diameter, moving at  $21^\circ/\text{sec}$ ). Pbg:  $n = 38$ ; LP:  $n = 30$ . Cumulative distributions as in B. **D)** Median  $\pm$  octiles of responses to an expanding dot (from  $2^\circ$  to  $50^\circ$  of diameter within 300 ms). Pbg:  $n = 84$ ; LP:  $n = 34$ . Cumulative distributions are shown for response amplitude during the expansion and for the response to the disappearance of the black dot. \*  $p < .05$ , \*\*  $p < .01$  Wilcoxon rank sum test.

238 The responses of these two neuronal populations revealed a few key differences, and some similarities, in  
239 the visual response properties to biologically relevant stimuli. We found strong and reliable responses of  
240 neurons in the parabigeminal nucleus to the presentation of a fast-moving black square (53° side length,  
241 moving at 150°/sec) moving in 8 directions (Figure 5E). Most parabigeminal but very few pulvinar  
242 neurons responded to this stimulus (Figure 5F). The response amplitude and duration of responding  
243 neurons was similar for both nuclei (Figure S5). A large fraction of parabigeminal neurons showed a  
244 preference for one or two directions of motion (Figure 6A). Similar to the big-fast square, we found that  
245 most parabigeminal neurons responded with a sharp peak (median amplitude: 11 Hz, median half-width:  
246 300 ms) to a small-fast dot (4° diameter, 150°/sec, Figure 6B). A large fraction of pulvinar neurons  
247 responded to this stimulus as well. Their responses were weaker but slightly sharper (median amplitude: 8  
248 Hz, median half-width: 280 ms). Small-slow black dots (4° diameter, 21°/sec) generally induced weak,  
249 sluggish responses in rather few neurons in both brain regions (Figure 6C). However, pulvinar neurons  
250 tended to respond more sharply as indicated by a significantly smaller half-width of their response  
251 (pulvinar: 205 ms; Pbg: 505 ms). Finally, we tested responses to black-expanding dot (expanding from 2°  
252 to 50° of diameter within 300 ms) (Figure 6D). We found that both parabigeminal and pulvinar units  
253 responded strongly to the expanding dot. Responses to the disappearance of the black dot (return of  
254 screen to grey) were stronger in the pulvinar (median: 13 Hz, range: 2 to 78 Hz in pulvinar vs median: 10  
255 Hz, range: 2 to 28 Hz in Pbg). Together, these findings suggest that the parabigeminal nucleus responds  
256 preferentially to movement of fast objects of different sizes moving in particular directions, while the  
257 pulvinar responds better to small and slower stimuli. Neurons in both nuclei are activated by expanding  
258 stimuli.

### 259 **Differences in visual responses of pulvinar and parabigeminal nucleus explained by selective** 260 **sampling of visual features**

261 Our anatomical, molecular and physiological data shows that distinct visual information from the retina is  
262 wired to the parabigeminal nucleus and pulvinar. We therefore asked whether we could explain any of the  
263 observed response differences in the collicular targets by their selective sampling of visual information  
264 from the retina. We found two main differences in the response properties of the collicular targets. First,  
265 we observed a striking selectivity for motion direction in the parabigeminal nucleus that is absent in the  
266 pulvinar (Figure 6A). In accordance with these results, we found that direction-selective retinal ganglion  
267 cells exclusively innervated the colliculo-parabigeminal (Figure 2 and 3).

268 Second, parabigeminal and pulvinar neurons responded differently to a biologically salient stimulus  
269 consisting of an expanding black dot (Figure 6D). Over 80% of the parabigeminal neurons were strongly  
270 activated by the onset of the dot stimulus, out of which more than 3/4 responded exclusively to the onset  
271 (Figure S6 left). Pulvinar neurons rarely responded to the onset of the dot, but had more diverse activity  
272 patterns including responses to the expansion, the time after expansion when the dot was stationary at its  
273 final size, and to the disappearance of the dot (Figure S6 right). These different response patterns are  
274 reflected in the longer response latencies in the pulvinar population compared to the parabigeminal  
275 population (median latency 90 ms and mean latency 189 ms in pulvinar vs median latency 40 ms and  
276 mean latency 120 ms in parabigeminal nucleus) (Figure 7A). One of the major inputs to the colliculo-  
277 parabigeminal and colliculo-pulvinar circuits stems from sustained OFF alpha cells (cluster 11 in Figure  
278 3), which could be separated into two functional groups *i* and *ii* that showed strong innervation  
279 preferences for the pulvinar and parabigeminal circuit, respectively (Figure 4). Interestingly, their  
280 responses to the expansion stimulus show comparable differences as their disinaptic targets (Figure 7B):

281

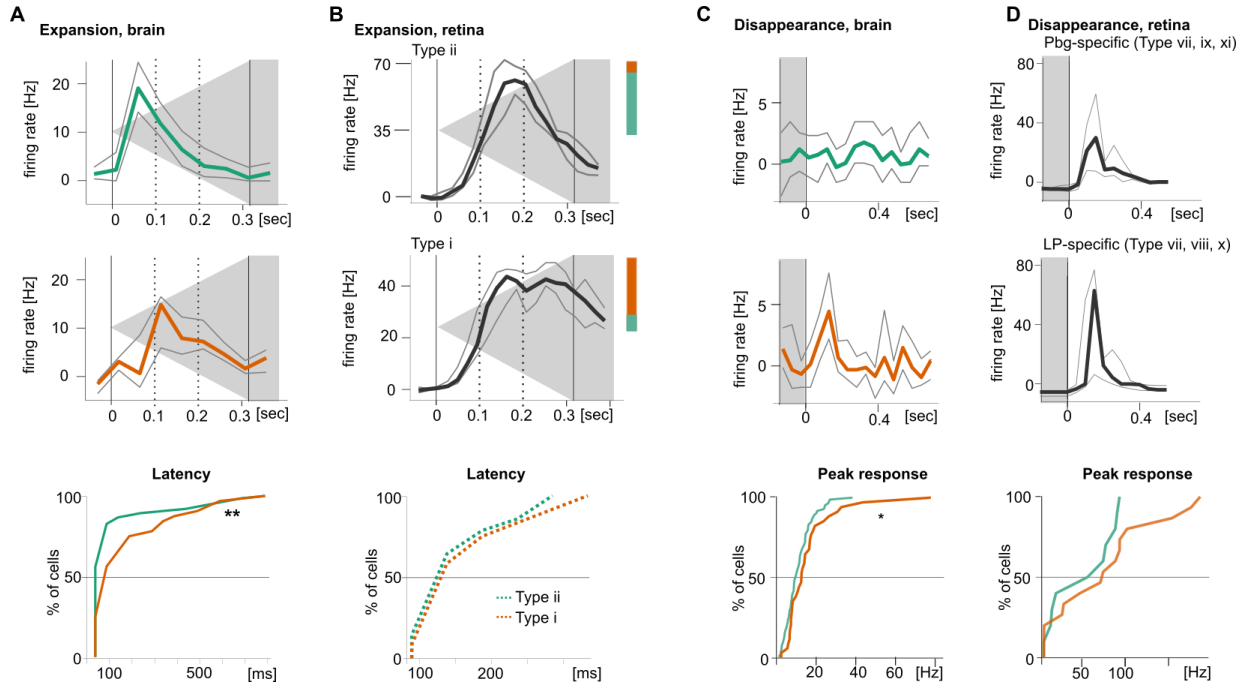

**Figure 7: Differences in visual responses of pulvinar and parabigeminal nucleus explained by selective sampling of visual features.** **A)** Population response to expanding dot stimulus for Pbg and pulvinar neurons. Bottom: Latency distributions of these responses. **B)** Population response to the same stimulus for Type *ii* and Type *i* ganglion cells. Coloured bars indicate percentages of ganglion cells from Pbg (green) and pulvinar experiments (orange). **C)** Population response to disappearance of expanding dot stimulus for Pbg and pulvinar neurons. Bottom: Response amplitude distributions. **D)** Population response to the same stimulus for ON-cells projecting to the parabigeminal (top) and pulvinar circuit (middle). \*  $p < .05$ , \*\*  $p < .01$  Wilcoxon rank sum test.

282 The parabigeminal-specific Type *ii* had a tendency towards faster responses than the pulvinar-specific  
283 Type *i* (median latency 125 ms and mean latency 154 ms in pulvinar vs median latency 125 ms and mean  
284 latency 167 ms in Type *ii*). Finally, the stronger response to the disappearance of the expanded dot in the  
285 pulvinar than in the parabigeminal nucleus (Figure 7C) is reflected in their respective retinal inputs where  
286 ganglion cells projecting to the pulvinar circuit show a stronger response than the parabigeminal-specific  
287 ones (median amplitude: 70 Hz in  $n = 15$  pulvinar-specific cells vs 61 Hz in  $n = 10$  parabigeminal-  
288 specific cells) (Figure 7D).

## 289 Discussion

290 By comparing the morphological, molecular and visual response properties of retinal ganglion cells  
291 innervating two different output pathways, parabigeminal nucleus and pulvinar, of the superior colliculus  
292 lead us to three conclusions (Figure 8). First, together the colliculo-parabigeminal and colliculo-pulvinar  
293 circuit sample from a limited set, ~14 out of more than 30 retinal ganglion cell types. Second, there is a  
294 clear segregation in the retinal ganglion cell types providing input to each circuit, where 7 putative  
295 ganglion cell types showed a strong preference for the colliculo-parabigeminal circuit, and 4 for the  
296 colliculo-pulvinar. Third, some of the response properties of neurons in the downstream targets could be  
297 explained by their selective sampling of different retinal ganglion cell types. These results support the  
298 notion that, in the superior colliculus, neural circuits are based on a dedicated set of connections between  
299 specific retinal inputs and different collicular output pathways.

300 We used a combination of morphological, molecular, and physiological cues to link the 14 clusters to  
301 known retinal ganglion cell types (Table S1). Using these criteria, we could confidently identify 8 of the  
302 14 putative retinal ganglion cell types, make a good prediction of 2 more, and limit the potential cell types  
303 for the other 4. The cells in cluster 1 are ON-OFF direction-selective cells, based on their characteristic  
304 dendritic structure that co-stratifies with the ChAT bands and positive CART labelling (Dhande et al.,  
305 2013; Sanes and Masland, 2014). The four alpha ganglion cell types (cluster 4, sustained ON alpha;  
306 Cluster 6 transient ON alpha, Cluster 9a/9b transient OFF alpha ; Cluster 11a/11b sustained OFF alpha)  
307 were positively identified based on their characteristic combination of positive SMI32 staining, dendritic  
308 anatomy and large cell body size (Bleckert et al., 2014; Krieger et al., 2017). Another cluster with  
309 indicative anatomical characteristics is cluster 8, containing cells that strongly resemble the “W3” cell,  
310 otherwise known as the “local-edge detector” or “object motion selective” cell (Farrow et al., 2013; Kim  
311 et al., 2010; Sümbül et al., 2014; Zhang et al., 2012). In addition, the second bistratified cluster 2 is most  
312 similar to ON orientation-selective neurons (Nath and Schwartz, 2016), and the small, dense OFF-cells in  
313 cluster 10 best match OFF orientation-selective neurons (Nath and Schwartz, 2017). There are three  
314 additional clusters that resemble cell types described by Sümbül and colleagues in terms of stratification  
315 pattern, size and dendritic density (Sümbül et al., 2014). First, the relatively dense ON-cells in cluster 3  
316 have a similar morphology as the Kb-cells and fit best our physiological Type *ix* – putative ON low  
317 frequency cells. Second, the larger OFF-cells in cluster 12 are similar to Z-cells and might correspond to  
318 the slow OFF cells (Type *v*). Cluster 5 cells are large ON-cells with a sparse dendritic tree. They resemble  
319 the cells provisionally labelled as “U” by Sümbül and colleagues and the G10-cell by Völgyi and  
320 colleagues (Sümbül et al., 2014; Volgyi et al., 2009). Based on chirp response and morphology, it is  
321 unclear whether these cells correspond to our functional Type *vii* (ON step), *x* (ON sustained) or *xii* (ON

322

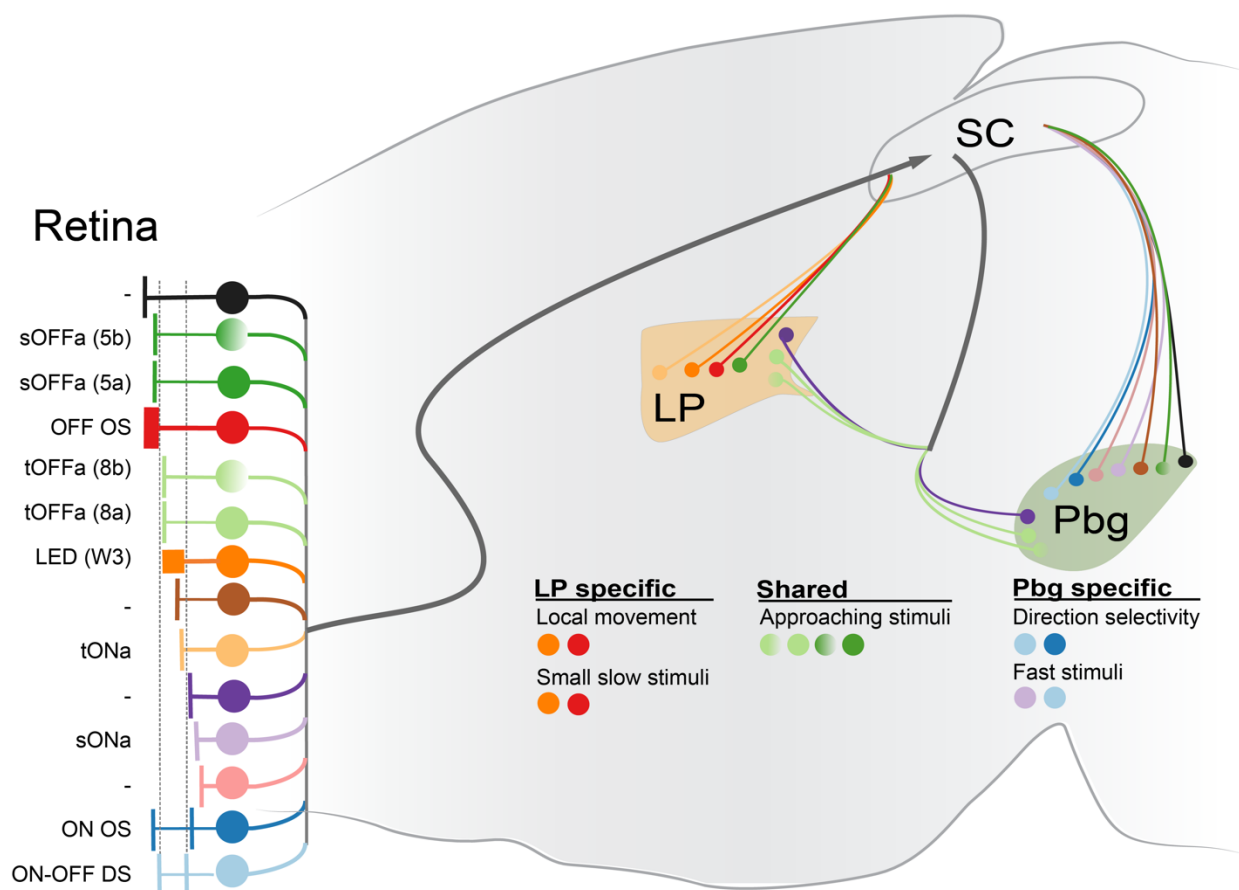

**Figure 8. Schematic illustrating projection specific logic of sampling of retinal ganglion cell inputs to the superior colliculus.** The color of the retinal ganglion cell types corresponds with the clusters defined in Figure 3. The functionally distinct sustained and transient OFF alpha ganglion cells (5a vs 5b and 8a vs 8b)) are indicated with shaded circles. The selective and shared response properties are shown with the putatively contributing retinal ganglion cell types indicated with coloured dots.



323 contrast suppressed). Finally, the cells in cluster 7 stratifying just above the ON-ChAT-band show a  
324 similar profile as G5-cells (Volgyi et al., 2009).

325 The two neural circuits investigated here are each known to mediate visually guided aversive behaviours  
326 (Shang et al., 2015; Wei et al., 2015). In this context, the responses to biologically relevant stimuli of the  
327 ganglion cells innervating the two circuits are of interest. We found that neurons in the pulvinar respond  
328 poorly to large stimuli, but have sharper responses to small, slowly moving stimuli, which have been  
329 suggested to mimic a distant predator (Zhang et al., 2012). In addition, neurons in the pulvinar and  
330 parabigeminal nucleus respond well to quickly expanding dark stimuli, which are thought to mimic a  
331 quickly approaching threat (De Franceschi et al., 2016; Wei et al., 2015; Zhang et al., 2012). While robust  
332 responses to approaching stimuli have been reported in both pulvinar-projecting and parabigeminal-  
333 projecting collicular neurons, only pulvinar-projecting collicular neurons have been reported to respond to  
334 small slowly moving stimuli (Gale and Murphy, 2014, 2016, Shang et al., 2015, 2018). Consistent with  
335 these results, we found that the putative ganglion cell types providing selective input to the colliculo-  
336 pulvinar circuit have smaller receptive fields and two of them resemble cell types known to respond well  
337 to local motion (Cluster 6 and 8). In addition, transient OFF-alpha cells (Type *iii* and *iv* and Cluster 9) are  
338 known to preferentially respond to expanding stimuli and could mediate these responses in both circuits  
339 (Shang et al., 2015, 2018; Wei et al., 2015). Colliculo-parabigeminal specific retinal ganglion cells have  
340 larger dendritic fields and their putative function is to respond to large moving objects and their motion  
341 direction (Cluster 1, 2 and 4), and we found similar stimulus preferences in the parabigeminal neurons.  
342 Together these ganglion cells might detect predators attacking from angles that are not recognized by  
343 expansion-detectors.

344 While some of the differences between the response properties of the parabigeminal nucleus and pulvinar  
345 can be explained by their distinct retinal inputs, we recorded visual responses in the retinal ganglion cells  
346 that could not be detected in their disynaptic targets. For instance, we classified ganglion cells based on  
347 their responses to a full-field chirp stimulus, which did not evoke any response in neurons of the pulvinar  
348 or parabigeminal nucleus (Figure S5B). In addition, the colliculo-pulvinar circuit receives inputs from  
349 ganglion cells that respond well to big and fast objects, but responses to such stimuli were weak or absent  
350 in the pulvinar neurons. Shunting of these visual responses are likely mediated by local inhibitory  
351 circuitry in the colliculus, where removal of local inhibition has been demonstrated to reveal responses to  
352 large, stationary objects in pulvinar-projecting neurons (Gale and Murphy, 2016).

353 Studies investigating the organization of retinal inputs to single cells in the lateral geniculate nucleus have  
354 suggested that there is a large degree of fuzziness/variability in the information each neuron receives from  
355 the retina (Hammer et al., 2015; Liang et al., 2018; Morgan et al., 2016; Rompani et al., 2017). Here we  
356 demonstrate that in the superior colliculus a high degree of regularity exists if one considers the projection  
357 targets. These differences could exist either because this study was performed in the superior colliculus,  
358 which might have a more “hard-wired” architecture; or because we focused on projection specific  
359 disynaptic circuits instead of comparing inputs to single neurons. When considering the layer specific  
360 targets of the lateral geniculate nucleus in the visual cortex Cruz-Martin et al. suggest that direction-  
361 selective neurons are preferentially sampled (Cruz-Martín et al., 2014). We propose that understanding  
362 the specific input structure to neurons and cell types with different projection profiles (Gale and Murphy,  
363 2014; Han et al., 2017) will greatly enhance our ability to create mechanistic models of how information  
364 from the sensory periphery informs the triggering of behaviours and decision making.

365

366 **Acknowledgements**

367 We thank Keisuke Yonehara for supplying the Ntsr1-GN209-Cre mice, as well as Norma Kühn and João  
368 Couto for reading the manuscript. Grants are as follows: Marie-Curie CIG (631909) and FWO Research  
369 Project (G094616N) to K.F. This project has received funding from the European Union's Horizon 2020  
370 research and innovation programme under the Marie Skłodowska-Curie grant agreement No 665501 to  
371 K.R. (12S7917N). C.L. is funded by the Chinese Scholarship Council.

372 **Contributions**

373 K.R., C.L. and K.F. conceived and designed the experiments and wrote the manuscript. K.R. and C.L.  
374 performed experiments and analysed the data. Q.D. implemented automated method for ChAT band  
375 detection. E.B. performed experiments. S.H. established the viral production facility.

376

377 **STAR★ METHODS**

378 **KEY RESOURCES TABLE**

| <b>REAGENT or RESOURCE</b>                           | <b>SOURCE</b>            | <b>IDENTIFIER</b>                   |
|------------------------------------------------------|--------------------------|-------------------------------------|
| <b>Antibodies</b>                                    |                          |                                     |
| Rabbit anti-GFP                                      | Thermo Fisher Scientific | Cat# A-11122;<br>RRID:AB_221569     |
| Chicken anti-GFP                                     | Thermo Fisher Scientific | Cat# A-10262;<br>RRID:AB_2534023    |
| Goat anti-ChAT                                       | Millipore                | Cat# AB144P<br>RRID:AB_11214092     |
| Mouse SMI32                                          | Biolend                  | Cat# 801701;<br>RRID:AB_2564642     |
| Rabbit anti-CART                                     | Phoenix Pharmaceuticals  | H-003-62;<br>RRID:AB_2313614        |
| Chicken anti-mCherry                                 | Novus                    | Cat# NBP2-25158<br>RRID:AB_2636881  |
| Alexa 488 donkey anti-rabbit                         | Thermo Fisher Scientific | Cat# A-21206;<br>RRID:AB_2535792    |
| Alexa 488 donkey anti-chicken                        | ImmunoJackson            | Cat# 703-545-155<br>RRID:AB_2340375 |
| Alexa 633 donkey anti-goat                           | Thermo Fisher Scientific | Cat# A-21082<br>RRID:AB_10562400    |
| Cy3 donkey anti-mouse                                | ImmunoJackson            | Cat# 715-165-151<br>RRID:AB_2315777 |
| DyLight 405 donkey anti-rabbit                       | ImmunoJackson            | Cat# 715-475-150<br>RRID:AB_2340839 |
| Cy3 donkey anti-chicken                              | ImmunoJackson            | Cat# 703-166-155<br>RRID:AB_2340364 |
| NeuroTrace™ 435/455 Blue Fluorescent Nissl Stain     | Thermo Fisher Scientific | Cat# N21479                         |
| DAPI                                                 | Roche                    | Cat# 10276236001                    |
| Cholera Toxin Subunit B conjugated with Alexa488     | Thermo Fisher Scientific | Cat# C22841                         |
| <b>Bacterial and Virus Strains</b>                   |                          |                                     |
| Rabies virus: G-coated SAD- $\Delta$ G-GCaMP6s       | This paper               | N/A                                 |
| Rabies virus: EnvA-coated SAD- $\Delta$ G-GCaMP6s    | This paper               | N/A                                 |
| HSV: hEF1a-TVA950-T2A-RabiesG-IRES-mCherry           | MIT core                 | RN714                               |
| HSV: hEF1a-LS1L-TVA950-T2A-RabiesG-IRES-mCherry      | MIT core                 | RN716                               |
| <b>Chemicals, Peptides, and Recombinant Proteins</b> |                          |                                     |
| 10x PBS                                              | VWR                      | Cat# 437117K                        |
| 1x PBS                                               | VWR                      | Cat# 444057Y                        |
| Histofix 4%                                          | Roche                    | Cat# P087.5                         |

|                                                                |                                                                 |                         |
|----------------------------------------------------------------|-----------------------------------------------------------------|-------------------------|
| Sucrose                                                        | Sigma                                                           | Cat# S0389-500G         |
| Sodium Azide (NaN <sub>3</sub> )                               | Sigma                                                           | Cat# S2002-100G         |
| Triton X-100                                                   | Sigma                                                           | Cat# S8875              |
| Normal Donkey Serum                                            | Millipore                                                       | Cat# 30-100ML           |
| 10% Bovine Albumin                                             | Sigma                                                           | Cat# SRE0036-250ML      |
| DABCO                                                          | Sigma                                                           | Cat# 290734             |
| DMEM, high-glucose                                             | Thermo Fisher Scientific                                        | Cat# 41965062           |
| Trypsin 0.05%                                                  | Thermo Fisher Scientific                                        | Cat# 25300054           |
| Fetal Bovine Serum (FBS)                                       | Thermo Fisher Scientific                                        | Cat# 10270106           |
| 2,2'-thiodiethanol (TDE)                                       | Sigma                                                           | Cat# 166782-500G        |
| ProLong® Gold Antifade Mounting Medium                         | Thermo Fisher Scientific                                        | Cat# P36934             |
| Lipophilic tracers DiI, DiD, DiO                               | Thermo Fisher Scientific                                        | Cat# D7776, D7757, D275 |
| Sodium Chloride (NaCl)                                         | Sigma                                                           | Cat# S7653-250G         |
| Potassium Chloride (KCl)                                       | Sigma                                                           | Cat# P5405-25G          |
| Calcium Chloride (CaCl <sub>2</sub> )                          | Sigma                                                           | Cat# C5670-100G         |
| Magnesium Chloride (MgCl <sub>2</sub> )                        | Sigma                                                           | Cat# 4880               |
| D-glucose (Dextrose)                                           | Sigma                                                           | Cat# D9434-250G         |
| Sodium phosphate monobasic (NaH <sub>2</sub> PO <sub>4</sub> ) | Sigma                                                           | Cat# S5011              |
| Sodium Hydroxide (NaOH)                                        | Sigma                                                           | Cat# 655104-500G        |
| Sodium bicarbonate (NaHCO <sub>3</sub> )                       | Sigma                                                           | Cat# S8875-1KG          |
| <b>Experimental Models: Cell Lines</b>                         |                                                                 |                         |
| BHK cells                                                      | Laboratory of Botond Roska/ Laboratory of Karl-Klaus Conzelmann | N/A                     |
| B7GG cells                                                     | Laboratory of Botond Roska/ Laboratory of Karl-Klaus Conzelmann | N/A                     |
| BHK-EnvA cells                                                 | Laboratory of Botond Roska/ Laboratory of Karl-Klaus Conzelmann | N/A                     |
| HEK293T-TVA cells                                              | Laboratory of Botond Roska/ Laboratory of Karl-Klaus Conzelmann | N/A                     |
| <b>Experimental Models: Organisms/Strains</b>                  |                                                                 |                         |
| C57BL/6 mouse line                                             | The Jackson laboratory                                          | JAX:000664              |
| Pvalb <sup>Cre</sup> mouse line                                | The Jackson laboratory                                          | JAX:008069              |
| Ntsr1-GN209 <sup>Cre</sup> mouse line                          | Laboratory of Keisuke Yonehara                                  | Genset: 030780-UCD      |
| Ai9 mouse line                                                 | The Jackson laboratory                                          | JAX:007909              |
| Gad2 <sup>Cre</sup> mouse line                                 | The Jackson laboratory                                          | JAX: 10802              |
| <b>Software and Algorithms</b>                                 |                                                                 |                         |

|                                                    |                                         |                                                                                                                                                                      |
|----------------------------------------------------|-----------------------------------------|----------------------------------------------------------------------------------------------------------------------------------------------------------------------|
| Fiji                                               | Schindelin et al. 2012                  | RRID:SCR_002285                                                                                                                                                      |
| MATLAB                                             | Mathworks                               | RRID:SCR_001622                                                                                                                                                      |
| Zen lite                                           | Zeiss                                   |                                                                                                                                                                      |
| CAFFE                                              |                                         | caffe.berkeleyvision.org                                                                                                                                             |
| ChAT band detector                                 | This paper                              | <a href="https://github.com/farrowlab/ChATbandsDetection">https://github.com/farrowlab/ChATbandsDetection</a>                                                        |
| VNET                                               |                                         | <a href="https://github.com/faustomilletari/VNet">github.com/faustomilletari/VNet</a>                                                                                |
| PYTHON                                             | Python Software Foundation              | www.python.org                                                                                                                                                       |
| t-distributed Stochastic Neighbor Embedding        | van der Maaten & Hinton 2008            |                                                                                                                                                                      |
| CANDLE                                             | Coupé et al. 2012                       |                                                                                                                                                                      |
| sparse PCA                                         |                                         | <a href="http://www2.imm.dtu.dk/projects/spasm">http://www2.imm.dtu.dk/projects/spasm</a>                                                                            |
| nanconv                                            | Benjamin Kraus                          | <a href="http://mathworks.com/matlabcentral/fileexchange/41961-nanconv">http://mathworks.com/matlabcentral/fileexchange/41961-nanconv</a>                            |
| retistruct                                         | Sterrat et al. 2013                     | <a href="http://davidsterratt.github.io/retistruct/">http://davidsterratt.github.io/retistruct/</a>                                                                  |
| SpikeGLX                                           |                                         | <a href="https://billkarsh.github.io/SpikeGLX/">https://billkarsh.github.io/SpikeGLX/</a>                                                                            |
| GNU Octave                                         | Free Software Foundation                | www.gnu.org/software/octave                                                                                                                                          |
| Psychophysics Toolbox                              | Psychtoolbox                            | <a href="http://psychtoolbox.org">http://psychtoolbox.org</a>                                                                                                        |
| SpyKING CIRCUS                                     | Yger et a. 2018                         | <a href="https://spyking-circus.readthedocs.io">https://spyking-circus.readthedocs.io</a>                                                                            |
| Phy                                                | Cortex Lab at University College London | <a href="https://phy-contrib.readthedocs.io">https://phy-contrib.readthedocs.io</a><br><a href="https://github.com/kwikteam/phy">https://github.com/kwikteam/phy</a> |
| WaveSurfer (version: 0.918)                        | Janelia Research Campus                 | <a href="http://wavesurfer.janelia.org/">http://wavesurfer.janelia.org/</a>                                                                                          |
| ScanImage                                          | Vidrio Technoloies                      | <a href="http://scanimage.vidriotechnologies.com">http://scanimage.vidriotechnologies.com</a>                                                                        |
| <b>Other</b>                                       |                                         |                                                                                                                                                                      |
| Rapid Flow Filters 0.2 µm pore size                | VWR                                     | Cat# 514-0027                                                                                                                                                        |
| Premium Standard Wall Borosilicate capillary glass | Warner Instrument                       | Cat# G100-4                                                                                                                                                          |
| Wiretrol® II capillary micropipettes               | Drumond Scientific                      | Cat# 5-000-2005                                                                                                                                                      |
| Borosilicate glass                                 | Sutter Instrument                       | Cat# BF100-20-10                                                                                                                                                     |
| Laser-Based Micropipette Puller                    | Sutter Instrument                       | Cat# P-2000                                                                                                                                                          |
| Small Animal Stereotaxic Workstation               | Narishige                               | Cat# SR-5N                                                                                                                                                           |
| Stereotaxic Micromanipulator                       | Narishige                               | Cat# SM-15R                                                                                                                                                          |
| Hydraulic Oil Micromanipulator                     | Narishige                               | Cat# MO-10                                                                                                                                                           |

|                                   |                  |                      |
|-----------------------------------|------------------|----------------------|
| Oil Microinjector                 | Narishige        | Cat# IM-9B           |
| Two-photon microscope             | Scientifica      | Serial# 14200        |
| 780 nm LED light source           | Thorlabs         | Cat# M780L3          |
| Patch-Clamp amplifier             | Molecular Device | Axon Multiclamp 700B |
| Patch-Clamp microscope            | Scientifica      | Slice Scope          |
| Patch-Clamp manipulator           | Scientifica      | Serial# 301311       |
| Zeiss LSM 710 confocal microscope | Zeiss            | Cat# LSM710          |
| Neuropixels phase 3A system       | Imec             |                      |
| FPGA Kintex-7 KC705               | Xilinx           | EK-K7-KC705-G        |
| Micromanipulator                  | Sensapex         | Cat# uMp-1           |

379

## 380 METHODS

### 381 EXPERIMENTAL MODEL AND SUBJECT DETAILS

382 In total, 72 mice (3-5 weeks old for virus injections, 2-3 months for *in-vivo* physiology) of either sex were  
383 used in our experiments including PvalbCre, PvalbCre x Ai9, Ntsr1-GN209Cre, Ntsr1-GN209Cre x Ai9,  
384 and Gad2Cre. PvalbCre mice (JAX: 008069) (Hippenmeyer et al., 2005) express Cre recombinase in  
385 parvalbumin-expressing neurons. Ntsr1-GN209Cre mice (Genset: 030780-UCD) express Cre  
386 recombinase in Ntsr1-GN209-expressing neurons. Gad2Cre mice (JAX: 010802) express Cre  
387 recombinase in Gad2-expressing neurons. Ai9 (JAX: 007909) is a tdTomato reporter mouse line (Madisen  
388 et al., 2010). Animals were maintained on a 12-hour light/dark cycle, and fed with sterilized food, water,  
389 bedding and nesting material. All animal procedures were performed in accordance with standard ethical  
390 guidelines of KU Leuven and European Communities Guidelines on the Care and Use of Laboratory  
391 Animals (004-2014/EEC, 240-2013/EEC, 252-2015/EEC).

### 392 METHOD DETAILS

#### 393 Rabies virus production

394 Rabies production method was similar to previously published methods (Osakada and Callaway, 2013;  
395 Yonehara et al., 2013). Glycoprotein G-coated, G-deleted B19 rabies virus (G-coated SAD-ΔG-GCaMP6s  
396 RV) was amplified in B7GG cells, which express rabies glycoprotein G. For amplification, approximately  
397  $10^6$  infectious units of G-coated SAD-ΔG-GCaMP6s RV were used to infect five 10-cm plates of 80%  
398 confluent B7GG cells followed by 2-6 hours of incubation. Then, infected B7GG cells were treated with  
399 0.05% trypsin and split into twenty-five 10-cm plates. To harvest the virus, we collected the supernatant  
400 of the infected cells every 3 days. 5-6 harvests were performed. To concentrate the virus, the supernatant  
401 was firstly centrifuged at 2,500 RPM and filtered (VWR, 514-0027) to get rid of the cell debris. Then the  
402 virus was spun in an ultracentrifuge for 5-12 hours at 25,000 RPM and at 4°C. After ultracentrifugation,  
403 the supernatant was discarded, and the pellet was dissolved in 200 μl of the original cell culture  
404 supernatant. The virus was tittered by counting a culture of infected BHK cells. To produce EnvA-coated  
405 SAD-ΔG-GCaMP6s RV, approximately  $10^6$  infectious units of G-coated SAD-ΔG-GCaMP6s RV were  
406 used to infect BHK-EnvA cells. The same procedure as for the G-coated RV amplification was then  
407 applied. EnvA-coated SAD-ΔG-GCaMP6s RV was tittered by infection of HEK293T-TVA cells. The titer  
408 used for injection ranged from  $10^7$  to  $10^9$  infectious units/ml (IU/ml).

## 409 **Surgical procedures**

410 Animals were quickly anesthetized with Isoflurane (Iso-vet 1000mg/ml) and then injected with a mixture  
411 of Ketamine and Medetomidine (0.75 mL Ketamine (100 mg/mL) + 1 mL Medetomidine (1 mg/mL) +  
412 8.2 mL Saline). Mice were placed in a stereotaxic workstation (Narishige, SR-5N). Dura tear  
413 (NOVARTIS, 288/28062-7) was applied to protect the eyes. To label the ganglion cells in the  
414 parabigeminal nucleus circuit, we performed the surgery on wild type mice and injected herpes-simplex-  
415 virus (HSV, hEF1a-TVA950-T2A-rabiesG-IRES-mCherry, MIT viral core, RN714) and EnvA-coated  
416 SAD- $\Delta$ G-GCaMP6s RV. In our experiment, we used PV-Cre mice as wild type mice. For the first  
417 injection of HSV into the parabigeminal nucleus, we used micropipettes (Wiretrol® II capillary  
418 micropipettes, Drumond Scientific, 5-000-2005) with an open tip of 30  $\mu$ m and an oil-based hydraulic  
419 micromanipulator MO-10 (Narishige) for stereotactic injections. Alternatively, we used an oil-based  
420 microinjector IM-9B (Narishige) with the corresponding micropipettes (Warner Instrument, G100-4) with  
421 an open tip of 30  $\mu$ m. The injection coordinates for a 4 weeks old mouse with a bregma-lambda distance  
422 of 4.7 mm were AP: -4.20; ML:  $\pm$ 1.95; DV: 3.50 mm. As the mice were different in body size, we  
423 adjusted the coordinates for each mouse according to their bregma-lambda distance. To label the injection  
424 sites, DiD (Thermo, D7757) was used to coat the pipette tip. We injected in total 100-400 nl HSV in  
425 single doses of up to 200 nl with a waiting time of 5-10 min after each injection. Twenty-one days later,  
426 we injected rabies virus (EnvA-coated SAD- $\Delta$ G-GCaMP6s) into the superior colliculus using the same  
427 method as for the HSV injections. The retinotopic location of the first injection into the parabigeminal  
428 nucleus or the pulvinar is unknown. To maximize the labelling of ganglion cells in the retina, we thus  
429 covered as much as possible of the superficial layer of the superior colliculus during the second injection.  
430 We injected 100-200 nl of rabies virus at a depth of 1.7 – 1.8 mm at 4 different locations within a 1 mm<sup>2</sup>  
431 field anterior of lambda and starting at the midline.

432 To label the pulvinar circuit, we performed the surgery on Ntsr1-GN209-Cre mice and injected a  
433 conditional HSV (hEF1a-LS1L-TVA950-T2A-RabiesG-IRES-mCherry, MIT viral core, RN716) and  
434 EnvA-coated SAD- $\Delta$ G-GCaMP6s RV. The injections into pulvinar and superior colliculus were the same  
435 as described for the parabigeminal nucleus. The injection coordinates for the pulvinar in a 4 weeks old  
436 mouse with a bregma-lambda distance of 4.7 mm were AP: -1.85; ML:  $\pm$ 1.50; DV: 2.50 mm.

437 Following injection, the wound was closed using Vetbond tissue adhesive (3M,1469). After surgery, mice  
438 were allowed to recover on top of a heating pad and were provided with soft food and water containing  
439 antibiotics (emdotrim, ecuphar, BE-V235523).

## 440 **Retina Immunohistochemistry**

441 Mouse retinas were extracted eight days after the rabies virus injection into the superior colliculus. After  
442 deep anaesthesia (120 $\mu$ l of Ketamine (100mg/ml) and Xylamine (2%) in saline per 20g body weight),  
443 eyes were gently touched with a soldering iron (Weller, BP650) to label the nasal part of the cornea and  
444 then enucleated. The retinas were extracted in 1x PBS (Diluted from 10x PBS (VWR, 437117K), pH 7.4)  
445 and three cuts were made to label the nasal, dorsal and ventral retina.

446 The dissected retinas were fixed in 4% paraformaldehyde (Histofix, ROTH, P087.5mm) with 100 mM  
447 sucrose for 30 min at 4°C, and then transferred to a 24-well plate filled with 1x PBS and washed 3 times  
448 for 10 min at room temperature or transferred into 15 ml 1x PBS and washed overnight or longer at 4 °C.  
449 After washing, retinas were transferred to wells containing 10% sucrose in 1x PBS with 0.1% NaN<sub>3</sub> (w/v)  
450 and allowed to sink for a minimum of 30 min at room temperature. Then retinas were transferred to wells  
451 containing 20% sucrose in 1x PBS with 0.1% NaN<sub>3</sub> (w/v) and allowed to sink for a minimum of 1 hour at

452 room temperature. Finally, retinas were put into 30% sucrose in 1x PBS with 0.1% NaN<sub>3</sub> (w/v) and  
453 allowed to sink overnight at 4°C. The next day, freeze-cracking was performed: retinas were frozen on a  
454 slide fully covered with 30% sucrose for 3-5 min on dry ice. The slides were then thawed at room  
455 temperature. The freeze-thaw cycle was repeated two times. Retinas were washed 3 times for 10 min  
456 each in 1x PBS, followed by incubation with blocking buffer (10% NDS, 1% BSA, 0.5% TritonX-100,  
457 0.02% NaN<sub>3</sub> in 1x PBS) for at least 1 hour at room temperature. Primary antibody solution was added  
458 after blocking and retinas were incubated for 5-7 days under constant gentle shaking at room temperature.  
459 Primary antibodies were rabbit anti-GFP (Invitrogen, A-11122, 1:500) and goat anti-ChAT (Chemicon,  
460 Ab144P, 1:200). They were prepared in 3% NDS, 1% BSA, 0.5% TritonX-100, 0.02% NaN<sub>3</sub> in 1x PBS.  
461 After incubation, retinas were washed 3 times for 10 min in 1x PBS with 0.5% TritonX-100 before being  
462 transferred into the secondary antibody solution (Alexa488 donkey anti-rabbit (Invitrogen, A21206,  
463 1/500) and Alexa633 donkey anti-goat (Invitrogen A-21082, 1:500); prepared in 3% NDS, 1% BSA, 0.5%  
464 TritonX-100, 0.02% NaN<sub>3</sub> in 1x PBS). Nuclei were stained with DAPI (Roche, 10236276001, 1:500)  
465 together with the secondary antibody solution. The retinas were incubated in the secondary antibody with  
466 DAPI solution overnight at 4 °C. Retinas were then washed 3 times in 1x PBS with 0.5% TritonX-100  
467 and 1 time in 1x PBS. Before mounting, the water in the sample was exchanged with different  
468 concentrations of 2,2'-Thiodiethanol (TDE) (Sigma, 166782-500G) buffer (10% -> 25% -> 50% -> 97%)  
469 (Staudt et al., 2007). Then the retinas were embedded in ProLong® Gold Antifade Mountant (Thermo,  
470 P36934) and gently covered with a #0 coverslip (MARIENFEL, 0100032, No.0, 18\*18 mm). To avoid  
471 squeezing the retinas, we put 4 strips of Parafilm (Parafilm, PM999) around the retina before adding the  
472 coverslip. Some of the retinas were mounted in 97% TDE with DABCO (Sigma, 290734) after immersion  
473 into TDE. Some retinas were mounted with ProLong® Gold Antifade Mountant directly after washing.  
474 Afterwards, nail polish was used to prevent evaporation and the samples were stored in darkness at 4 °C.

#### 475 **Retina Immunohistochemistry (for RGC molecular marker staining)**

476 Similar procedures were used to stain the retinas for neurofilament or CART. After fixation, freeze-  
477 cracking and blocking, primary antibody solution was added and the retinas were incubated for 5-7 days  
478 with gentle shaking at room temperature. Primary antibodies used were chicken anti-GFP (Invitrogen, A-  
479 10262, 1:500), goat anti-ChAT (Chemicon, Ab144P, 1:200), mouse SMI32 (Biolend, 801701,1:1000) and  
480 rabbit anti-CART (Phoenix, H-003-62,1/500). They were prepared in 3% NDS, 1% BSA, 0.5% TritonX-  
481 100, 0.02% NaN<sub>3</sub> in 1x PBS. Retinas were washed 3 times, 15 min each, in 1x PBS with 0.5% TritonX-  
482 100 before being transferred into the secondary antibody solution consisting of Alexa488 donkey anti-  
483 chicken (ImmunoJackson, 703-545-155, 1:500) and Alexa633 donkey anti-goat (Invitrogen A-21082,  
484 1:500), Cy3 donkey anti-mouse (ImmunoJackson, 715-165-151, 1:400) and DyLight™ 405 donkey anti-  
485 rabbit (ImmunoJackson, 715-475-150, 1:200) with 3% NDS, 1% BSA, 0.5% TritonX-100, 0.02% NaN<sub>3</sub> in  
486 1x PBS. Retinas were incubated in secondary antibody solution overnight at 4°C. Slices were washed 3  
487 times for 10-15min each in 1x PBS with 0.5% TritonX-100 and 1 time in 1x PBS. After washing, the  
488 retinas were immersed in different concentrations of TDE buffer, then were mounted with either 97%  
489 TDE with DABCO or ProLong® Gold Antifade Mountant. Some of the retinas were directly mounted  
490 with ProLong® Gold Antifade Mountant without increasing concentrations of TDE.

#### 491 **Brain Immunohistochemistry**

492 After removing the eyes, mice were immediately perfused with 1x PBS and 4% paraformaldehyde (PFA)  
493 and brains were post-fixed in 4% PFA overnight at 4 °C. Vibratome sections (100-200 μm) were collected  
494 in 1x PBS and were incubated in blocking buffer (1x PBS, 0.3% Triton X-100, 10% Donkey serum) at  
495 room temperature for 1 hour. Then slices were incubated with primary antibodies in blocking buffer



496 overnight at 4 °C. The next day, slices were washed 3 times for 10 min each in 1x PBS with 0.3%  
497 TritonX-100 and incubated in secondary antibody solution diluted in blocking buffer for 2 hours at room  
498 temperature or overnight at 4 °C. Primary antibodies used were rabbit anti-GFP (Thermo Fisher, A-11122,  
499 1:500) and chicken anti-mCherry (Novus, NBP2-25158, 1:1000) and secondary antibodies used were  
500 Alexa488 donkey anti-rabbit (Thermo Fisher, A21206, 1:500-1000) and Cy3 donkey anti-chicken  
501 (ImmunoJackson, 703-166-155, 1:800-1000). Nuclei were stained with DAPI (Roche, 10236276001,  
502 1:500) together with the secondary antibody solution. Sections were then again washed 3 times for 10 min  
503 in 1x PBS with 0.3% TritonX-100 and 1 time in 1x PBS, covered with mounting medium (Dako, C0563)  
504 and a glass coverslip. For the Pbg experiments, we applied Nissl stain instead of the DAPI stain, where  
505 the Pbg can be identified as a cell-dense area. Nissl stain was applied after the secondary antibody  
506 staining. After washing with 1x PBS, the brain slices were incubated with Nissl in 1x PBS (NeuronTrace  
507 435/455, Thermo, N21479, 1:150) for at least 20 minutes at room temperature. Afterwards, the sections  
508 were rinsed for 10 minutes in 1x PBS with 0.1% TritonX-100, followed by another 2 times washing for 5  
509 minutes each in 1x PBS. Finally, the sections were washed on a shaker for 2 hours at room temperature or  
510 overnight at 4 °C in 1x PBS.

### 511 **Confocal Microscopy**

512 Confocal microscopy was performed on a Zeiss LSM 710 microscope. Overview images of the retina and  
513 brain were obtained with a 10x (plan-APOCHROMAT 0.45 NA, Zeiss) objective. The following settings  
514 were used: zoom 0.7, 4x4-tiles with 0 to 15% overlap, 2.37 µm/pixel resolution. For single retina  
515 ganglion cell scanning, we used a 63x (plan-APOCHROMAT 1.4 NA, Zeiss) objective. The following  
516 settings were used: zoom 0.7, 2x2-tiles or more (depending on size and number of cells) with 0 to 15%  
517 overlap. This resulted in an XY-resolution of 0.38 µm/pixel and a Z-resolution between 0.25 and 0.35  
518 µm/pixel. The Z-stacks covered approximately 50 µm in depth.

### 519 ***In-vivo* electrophysiology**

#### 520 *Surgical procedure*

521 8 PV-Cre mice of either sex at the age of 2-2.5 months were quickly anesthetized with Isoflurane (Iso-vet  
522 1000 mg/ml) and then either maintained under Isoflurane anaesthesia or injected with a mixture of  
523 Ketamine and Medetomidine (0.75 mL Ketamine (100 mg/mL) + 1 mL Medetomidine (1 mg/mL) + 8.2  
524 mL Saline). Lidocaine (0.5%, 0.007 mg/g body weight) was injected under the skin above the skull, the  
525 animal's head was shaved, the skin and muscle tissue removed, and a titanium head plate fixed to the  
526 skull using dental cement (Metabond, Crown & Bridge). After recovery from anaesthesia animals were  
527 single-housed and were administrated Buprenorphine and Cefazolin for 60 hr post-surgery  
528 (Buprenorphine 0.2 mg/kg I.P. and Cefazolin 15 mg/kg I.P. in 12-hour intervals) and Dexamethasone  
529 (max. 0.2 ml of 0.1 mg/ml per day) depending on the condition of the animal. After this recovery phase  
530 animals were habituated for 3-4 days to the recording setup in sessions of increasing head-fixed time. One  
531 day before the first recording, the animals were anesthetized with Isoflurane and small craniotomies were  
532 performed (approximately 100 µm diameter, elongated to up to 300 µm laterally for parabigeminal  
533 coordinates and posteriorly for pulvinar coordinates). Coordinates were adjusted to each mouse's skull  
534 size based on standard coordinates for a bregma-lambda distance of 4.7 mm. Standard coordinates  
535 pulvinar: bregma -2.0 / 1.7 lateral. Parabigeminal nucleus: bregma -4.2 / 2.0 lateral.

#### 536 *Data acquisition*

537 Silicone Neuropixels probes phase 3A (Imec, Belgium) (Jun et al., 2017) were used to record light  
538 responses in the pulvinar and parabigeminal nucleus. The Neuropixels probes consist of a single shaft  
539 with 960 recording electrodes arranged in 480 rows with two electrodes each. The spacing between

540 electrodes within a row (x) is 16  $\mu\text{m}$ , and rows are 20  $\mu\text{m}$  apart from each other (y) resulting in recording  
541 site length of 9600  $\mu\text{m}$ . The 384 electrodes at the tip of the probe were recorded simultaneously in all  
542 experiments. Signals were split online into high-frequency (>300 Hz) and low-frequency (<300 Hz) and  
543 recorded separately at 30 kHz using the Neuropixels headstage (Imec), base-station (Imec) and a Kintex-7  
544 KC705 FPGA (Xilinx). SpikeGLX was used to select recording electrodes, to calculate gain corrections  
545 and to observe and save the data. Stimulus timing information was recorded simultaneously using the  
546 digital ports of the base-station.

#### 547 *Presentation of Visual Stimuli*

548 A calibrated 32-inch LCD monitor (Samsung S32E590C, 1920 x 1080 pixel resolution, 60 Hz refresh  
549 rate, average luminance of 2.6 cd/m<sup>2</sup>) was positioned 35 cm in front of the right eye, so that the screen  
550 was covering 100° of azimuth and 70° of altitude of the right visual field. Visual stimuli were presented  
551 on a gray background (50% luminance), controlled by Octave (GNU Octave) and Psychtoolbox (Kleiner  
552 et al., 2007). The following visual stimuli were used:

553 Large moving square: A black square of 53° side length moved with a speed of 150 °/sec across the screen  
554 in 8 direction (0°, 45°, 90°, 135°, 180°, 225°, 270°, 315°). Each direction was repeated 10 times.

555 Fast-small dot: A black dot of 4° diameter moved with 150 °/sec in two direction (left-right, right-left) at  
556 three different positions (centre, upper quarter, lower quarter) across the screen. Each position and  
557 direction was repeated 10 times.

558 Small-slow dot: Similar to the fast-small objects, a black dot of 4° diameter moved with 21 °/sec in two  
559 directions at three positions across the screen.

560 Expansion: A small dot linearly expanded from 2° to 50° of diameter within 300 ms at the centre of the  
561 screen. The stimulus was repeated 10 times.

562 Full-field “chirp” modulation: A full-field stimulus based on the “chirp” stimulus (Baden et al., 2016)  
563 starting with slow transitions gray-black-gray-white-gray (3 sec at each level), followed by a temporal  
564 modulation between black and white starting at 0.5 Hz and increasing to 8 Hz over a time of 6 sec. After 3  
565 sec at a gray screen, the contrast was modulated from 0 to 100% over a time period of 5.5 sec at 2 Hz.  
566 The stimulus was repeated 10 times.

#### 567 *Experimental Design*

568 Head-posted animals were fixed on a treadmill in front of the screen. For all pulvinar and some  
569 parabigeminal recordings, we coated the Neuropixels probe with a fluorescent dye (DiI, DiD or DiO,  
570 Thermo Fisher). The coordinates for the pulvinar (N = 4 recordings) or parabigeminal nucleus (N = 5)  
571 were measured again and the probe was slowly lowered into the brain using a micromanipulator. Some  
572 artificial cerebrospinal fluid (150 mM NaCl, 5 mM K, 10 mM D-glucose, 2 mM NaH<sub>2</sub>PO<sub>4</sub>, 2.5 mM  
573 CaCl<sub>2</sub>, 1 mM MgCl<sub>2</sub>, 10 mM HEPES adjusted to pH 7.4 with NaOH) was used to cover the skull. Then,  
574 the probe was lowered to the desired depth. In most cases, the probe was inserted further than the targeted  
575 brain area to ensure that the whole nucleus was covered. After 20-30 min, visual stimulation and  
576 recording of neural activity was started. The setup was covered with black curtains during the whole  
577 experiment.

#### 578 *Brain Histology for Probe Location*

579 To facilitate the identification of the pulvinar and the correct location of the probe, we injected Cholera  
580 Toxin Subunit B conjugated with Alexa488 (Thermo Fisher) into the contralateral eye to label retinal  
581 targets such as the laterogeniculate nucleus of the thalamus. Then, the brain was fixed and Vibratome

582 sections (100  $\mu\text{m}$ ) were collected in 1x PBS. The slices were washed in 1x PBS with 0.3% TritonX-100,  
583 then washed in 1x PBS and incubated for 20 min at RT with fluorescent Nissl Stain (NeuroTrace 435/455,  
584 Thermo Fisher, 1:150). Afterwards, the slices were washed in 1x PBS with 0.3% TritonX-100 and for at  
585 least 2h in 1x PBS. Brain slices were covered with mounting medium (Dako) and a glass coverslip, and  
586 imaged using a confocal microscope.

## 587 **Retinal electrophysiology**

### 588 *Preparation of Retinas*

589 For *in-vitro* recordings of retinal ganglion cells, we used mice that had been injected with herpes-simplex  
590 virus into the Pbg or pulvinar and rabies virus into the superior colliculus to label circuit specific retinal  
591 ganglion cells as described above. For pulvinar experiments, we analysed 47 cells from 14 Ntsr-Cre mice.  
592 For Pbg specific ganglion cells, we recorded 40 cells in retinas from PV-Cre (N = 8) or Gad2-Cre (N = 2)  
593 mice. Retinas were isolated from mice that were dark-adapted for a minimum of 30 minutes. Retina  
594 isolation was done under deep red illumination in Ringer's medium (110 mM NaCl, 2.5 mM KCl, 1 mM  
595  $\text{CaCl}_2$ , 1.6 mM  $\text{MgCl}_2$ , 10 mM D-glucose, 22 mM  $\text{NaHCO}_3$ , bubbled with 5%  $\text{CO}_2/95\% \text{O}_2$ , pH 7.4). The  
596 retinas were then mounted ganglion cell-side up on filter paper (Millipore, HAWP01300) that had a 3.5  
597 mm wide rectangular aperture in the centre, and superfused with Ringer's medium at 32–36°C in the  
598 microscope chamber for the duration of the experiment.

### 599 *Electrophysiology*

600 Electrophysiological recordings were made using an Axon Multiclamp 700B amplifier (Molecular  
601 Devices) and borosilicate glass electrodes (BF100-50-10, Sutter Instrument). Signals were digitized at 20  
602 kHz (National Instruments) and acquired using WaverSurfer software (version: 0.918) written in  
603 MATLAB. The spiking responses were recorded using the patch clamp technique in loose cell-attached  
604 mode with electrodes pulled to 3-5  $\text{M}\Omega$  resistance and filled with Ringer's medium. To visualize the  
605 pipette, Alexa 555 was added to the Ringer's medium.

### 606 *Targeted Recordings using Two-Photon Microscopy*

607 Fluorescent cells were targeted for recording using a two-photon microscope (Scientifica) equipped with  
608 a Mai Tai HP two-photon laser (Spectra Physics) integrated into the electrophysiological setup. To  
609 facilitate targeting, two-photon fluorescent images were overlaid with the IR image acquired through a  
610 CCD camera. Infrared light was produced using the light from an LED. For some cells, z-stacks were  
611 acquired using ScanImage (Vidrio Technologies).

### 612 *Presentation of Visual Stimuli*

613 Stimuli were generated with an LCD projector (Samsung, SP F10M) at a refresh rate of 60 Hz, controlled  
614 with custom software written in Octave based on Psychtoolbox. The projector produced a light spectrum  
615 that ranged from ~430 nm to ~670 nm. The power produced by the projector was 240  $\text{mW}/\text{cm}^2$  at the  
616 retina. Neutral density filters were used to control the stimulus intensity in logarithmic steps. Recordings  
617 were performed with filters decreasing the stimulus intensity by 1-2 log units. The following visual  
618 stimuli were used for retinal recordings:

619 Full-field “chirp” modulation: A full-field stimulus based on the “chirp” stimulus (Baden et al., 2016)  
620 starting with slow transitions gray-black-gray-white-gray (3 sec at each level), followed by a temporal  
621 modulation between black and white starting at 0.5 Hz and increasing to 8 Hz over a time of 6 sec. After 3  
622 sec at a gray screen, the contrast was modulated from 0 to 100% over a time period of 5.5 sec at 2 Hz.  
623 The stimulus was repeated 10 times.

624 Spot-size: A black or white spot of 6 sizes (4°, 8°, 12°, 16°, 20°, 40°) was shown for 2 sec at the centre of  
625 the gray screen. Both the colours and the sizes were shown in random sequence.

626 Large moving bar: A black bar with a width of 40° moved with a speed of 150°/sec across the screen in 8  
627 directions (0°, 45°, 90°, 135°, 180°, 225°, 270°, 315°). Each direction was repeated 5 times. The  
628 directions were randomized.

629 Expansion: A black dot linearly expanded from 2° to 50° of diameter within 300 ms (150°/sec) at the  
630 centre of the screen. The stimulus was repeated 10 times.

631 Dimming: A dot of 50° diameter linearly dimmed from background gray to black within 300 ms  
632 (150°/sec) at the centre of the screen. The stimulus was repeated 10 times.

633 Looming objects: A small dot non-linearly expanded from 2° to 50° of diameter at a slow (18.5°/sec),  
634 medium (92°/sec) and fast speed (150°/sec). Each condition was repeated 10 times.

635 Slow-small objects: A black dot of 4° diameter moved with 21 °/sec in two direction (left-right, right-left)  
636 at the centre line across the screen. Each direction was repeated 5 times.

### 637 *Morphology of Patched cells*

638 After patching, retinas were fixed and stained as described above. If the rabies labelling density allowed  
639 it, the morphology of the patched cells was imaged using a confocal microscope.

## 640 **QUANTIFICATION AND STATISTICAL ANALYSIS**

### 641 **Morphology of individual ganglion cells**

642 The confocal Z-stacks were down-sampled and a threshold was applied to extract the dendritic tree. The  
643 position of the ChAT-planes was extracted and used to warp both the ChAT-signal as well as the binary Z-  
644 stack of the labelled cell. Then, dendrites from other cells, noise, and axons were removed and the  
645 position of the cell body was measured. The resulting warped dendritic tree was used for further analysis  
646 such as computation of the dendritic profile and area measurements. All code can be found on github  
647 (<https://github.com/farrowlab/>).

648 Down-sampling and binarization: The confocal Z-stacks of individual ganglion cells were denoised using  
649 the CANDLE package for MATLAB (Coupé et al., 2012) and down-sampled to have a resolution of XYZ  
650 = 0.5 x 0.5 x (0.25 to 0.35) µm per pixel and saved as MATLAB files. We then manually selected a  
651 threshold to transform the GFP-signal (i.e. the labelled cell) into a binary version where the whole  
652 dendritic tree was visible but noise was reduced as much as possible using an adapted version of the  
653 method described in (Sumbul et al., 2014; Sümbül et al., 2014).

654 Extraction of ChAT-positions: ChAT-band positions were either extracted manually or automatically  
655 using a convolutional neural network. For manual extraction, the ChAT-signal was smoothed using a two-  
656 dimensional standard-deviation filtering approach in the XY plane with a size of 21 x 21 pixels. The  
657 resulting Z-stacks were loaded into Fiji (Schindelin et al., 2012). ChAT-band positions were marked as  
658 described in (Sümbül et al., 2014). Briefly, we labelled points in the ON- and OFF-band with an  
659 approximate spacing of 20 µm in X- and Y-direction. For automated labelling, an end-to-end 3D  
660 Convolutional Neural Network called V-Net with a Dice Loss Layer (Milletari et al., 2016) was trained  
661 on noisy greyscale images of ChAT-images, to denoise and remove any cell bodies, creating a probability  
662 map of background and foreground, with foreground being voxels that might belong to the ChAT-bands.  
663 Two smoothness-regularized-least squares surfaces were fitted to manually labelled data to train the  
664 algorithm and to create ground truth binary masks. Then, Otsu's thresholding method combined with  
665 connected component analysis was performed on the resulting probability map to automatically locate the

666 points that belong to the ChAT-bands in new data-sets. Finally, two surfaces were independently fit to the  
667 corresponding data points to approximate the two ChAT-bands  
668 (<https://github.com/farrowlab/ChATbandsDetection>).

669 Warping: An adapted version of the code developed in the lab of Sebastian Seung was used to warp the  
670 GFP-signal (Sümbül et al., 2014). Briefly, the ChAT-band locations were used to create a surface map,  
671 which then was straightened in 3D-space. Then, the binarized GFP-signal was warped accordingly.

672 Soma position and removal of noise: After warping, the soma position was determined by filtering the  
673 GFP-signal with a circular kernel (adapted from (Sümbül et al., 2014)). If this method detected the soma,  
674 it was used to remove the soma from the GFP-data and the centre of mass was taken as the soma position.  
675 If this automated method failed, the soma position was marked manually. Afterwards, dendrites of other  
676 cells, axons, and noise were removed manually: The warped GFP-signal was plotted in side-view and en-  
677 face view in MATLAB and pixels belonging to the cell were selected manually.

678 Computation of the dendritic profile and area: The distribution of the cell's dendritic tree was computed  
679 (Sümbül et al., 2014). Briefly, the Z-positions of all GFP-positive pixels were normalized to be between -  
680 0.5 and 0.5. Then the Fourier transform of an interpolating low-pass filter was used to filter the Z-  
681 positions. This resulted in a vector containing the distribution of pixels in the Z-direction. If necessary,  
682 this profile was used to manually remove remaining axonal or somal pixels. In this case, the dendritic  
683 profile was computed again after cleaning of the data. The area of the dendritic tree was approximated by  
684 computing a convex hull (regionprops function in MATLAB). When diameters are given, they were  
685 calculated as  $D = 2 \cdot (\text{area} / \pi)^{1/2}$ .

686 Down-sampling of dendritic tree for plotting: For en-face plots of the dendritic arbour, they were down-  
687 sampled by calculating the local neighbourhood median of all labelled pixels in patches of 50 x 50 pixels  
688 and with a sliding window of 10 pixels.

### 689 **Clustering of retinal ganglion cell morphology**

690 Affinity-propagation clustering: The dendritic stratification profiles of 301 ganglion cells were smoothed  
691 with the MATLAB function movmean (moving average with sliding window of 5 data points  
692 corresponding to 1.7 a.u. in stratification depth). The profiles of manually identified bistratified cells were  
693 set to negative values. The median dendritic profile of cells for which the molecular identity was known  
694 (SMI32 or CART), was calculated (4 different SMI32 cell types, 1 CART). Then the 5 first principle  
695 components of those medians and of the dendritic profiles of cells without known molecular identity were  
696 computed using sparse PCA (<http://www2.imm.dtu.dk/projects/spasm/>) and the similarity matrix of these  
697 principle components was calculated using the pdist function of MATLAB using Euclidean distance.  
698 Affinity-propagation (apcluster function in MATLAB) was used to cluster the similarity matrix with  
699 different preference values ranging from -1 to 0.6. The preference value for the 5 cluster centres based on  
700 SMI32- and CART-positive cells was always set to 1. Cells with known molecular identity were assigned  
701 to the clusters to whose median they contributed. Three validation indices (Calinski-Harabasz, Silhouette,  
702 Davies-Bouldin) were computed using the evalclusters function in MATLAB, normalized, and their  
703 median was used to determine the optimal preference value.

704 tSNE visualization: For visualization of the clustering result, we generated a five-dimensional non-linear  
705 embedding of the cells using t-distributed Stochastic Neighbor Embedding, tSNE (Van Der Maaten and  
706 Hinton, 2008). We used the smoothed dendritic profiles as input data, used cosine as a distance  
707 measurement, and set the number of PCA dimensions, which are calculated in a first step, to 25. For the  
708 graph in this paper, we show comparisons of the resulting tSNE dimension 1, 2, and 4.

## 709 **Size distribution analysis**

710 Retinal position: To calculate the visuotopic position of the analysed ganglion cells, we used the R-  
711 package `retistruct` (Sterratt et al., 2013), which morphs a flat retina with cuts onto a curvilinear surface.  
712 We manually labelled the nasal corner of the retina as well as tears and cuts. Reconstruction by `retistruct`  
713 was then achieved by stitching the marked-up cuts; dividing the stitched outline into a mesh whose  
714 vertices then are mapped onto a curtailed sphere; and finally moving the vertices so as to minimise a  
715 physically-inspired deformation energy function (Sterratt et al., 2013). The resulting angle and radial  
716 distance from the optic nerve were used for plotting and quantification of retinal ganglion cell positions.

717 Comparison to PV cells: For size distribution comparisons, we used previously published data from 8  
718 different types of parvalbumin-positive (PV) ganglion cells (Farrow et al., 2013). For each of our 12  
719 clusters, we looked for a PV-type with a similar stratification depth and average dendritic field size. If  
720 there was such a PV-type, we calculated the median and quartiles of the dendritic field diameters of all  
721 cells of this type and compared it to our data.

722 Retinotopic size distribution: For retinotopic size distribution calculations, we computed a moving  
723 median diameter within a circular window of 250  $\mu\text{m}$  radius, moving by 100  $\mu\text{m}$ . The resulting 50 x 50  
724 median size matrix was convolved with a gaussian with  $\sigma = 200 \mu\text{m}$  (using MATLAB function  
725 `fspecial` and `nanconv`).

## 726 **Quantification of SMI32+ cells and CART+ cells**

727 Numbers of double-labelled cells: To quantify the number of double-positive cells for CART/GCaMP6s  
728 and SMI32/GCaMP6s, we scanned a z-stack (1 to 5  $\mu\text{m}$  Z-resolution) of the whole retina using the  
729 confocal microscope with an 10x objective. Images of the anti-CART or SMI32 and the anti-GFP staining  
730 were opened in Fiji. For counting CART<sup>+</sup> cells, cells were marked using the point tool and counted  
731 manually. Note that the anti-CART antibody also labels a group of amacrine cells, therefore the complete  
732 Z-stack should be checked for each CART<sup>+</sup> cell to make sure that the labelling truly overlaps with the  
733 anti-GFP signal. The CART expression pattern was consistent with previous reports (Kay et al., 2011). In  
734 total we counted 3 retinas for parabigeminal experiments and 6 retinas for pulvinar experiments. For  
735 SMI32<sup>+</sup> stainings, cells were counted manually using the cell counter plugin. In total we counted 3  
736 retinas for parabigeminal experiments and 4 retinas for pulvinar experiments.

737 Numbers of cells for types of alpha cells: To test which of the four alpha cell types were part of each  
738 circuit, we acquired small high-resolution Z-stacks (2.5  $\mu\text{m}/\text{pixel}$ ) of XY = 103 x 103  $\mu\text{m}$  size (128 x 128  
739 pixel, 63x objective) covering the full depth of the dendritic tree and centred around the soma of 91  
740 SMI32<sup>+</sup> / GCaMP6s<sup>+</sup> cells in n = 3 retinas from parabigeminal experiments and 90 SMI32<sup>+</sup> / GCaMP6s<sup>+</sup>  
741 cells in n = 3 retinas from pulvinar experiments. We plotted top and side views of each Z-stack in  
742 MATLAB and manually decided for each cell if it was a sustained ON-alpha cell (dendrites below the  
743 ON- ChAT band), a transient ON-alpha (dendrites just above the ON- ChAT band), a transient OFF-alpha  
744 (dendrites just below or on the OFF- ChAT band) or a sustained OFF-alpha cell (dendrites above the  
745 OFF- ChAT band).

## 746 **Spike sorting**

747 The high-pass filtered in-vivo data was automatically sorted into individual units using SpyKING  
748 CIRCUS (Yger et al., 2018). The following parameters were used: `cc_merge` = 0.95 (merging if cross-  
749 correlation similarity > 0.95), `spike_thresh` = 6.5 (threshold for spike detection), `cut_off` = 500 (cut-off  
750 frequency for the butterworth filter in Hz). Automated clustering was followed by manual inspection,  
751 merging of units if necessary and discarding of noise and multi-units using `phy` ([30](https://phy-</a></p></div><div data-bbox=)

752 contrib.readthedocs.io). Units were evaluated based on the average waveform shape and auto-  
753 correlogram. Only cells without any inter-spike intervals of  $\leq 1$  ms were considered.

#### 754 **Analysis of in-vivo recordings**

755 Unless otherwise noted, firing rates were calculated as the number of spikes in 50 ms bins averaged  
756 across the 10 stimulus repetitions. Z-scores were calculated as the number of standard deviations from the  
757 mean spontaneous activity before stimulus onset. All sorted units were grouped into cells with a maximal  
758 response amplitude  $> 2$  standard deviations above the mean spontaneous firing rate ('potentially  
759 responding') and cells without such a peak ('non-responding'). The activity to each stimulus repetitions  
760 was inspected for the 'potentially responding' cells to identify truly responding cells manually, which then  
761 were used for further analysis, average response calculations and visualization. For small stimuli shown at  
762 three different locations and moving in two different directions, only the strongest response was  
763 considered for population analysis.

764 DSI: Direction-selectivity was calculated based on the summed, back-ground subtracted activity during  
765 the time from the onset of the fast moving square until the end of the presentation for each direction  $\alpha$ .  
766 These 8 response measurements  $R_k$  were normalized to the maximum and the DSI was calculated  
767 according to:  $\sum_k R_k \cdot e^{a_{ik}} / \sum_k R_k$ .

768 Half-width of response to small, slow dot: Mean firing rates for each cell were background subtracted and  
769 the MATLAB function findpeaks was used to find the half-width of the highest peak.

#### 770 **Analysis of patch-clamp recordings**

771 The loose-patch extracellular recording traces were high-pass filtered. Events that exceeded an amplitude  
772 threshold were extracted. Unless otherwise noted, firing rates were calculated as the number of spikes in  
773 50 ms bins averaged across the 5-10 stimulus repetitions.

774 Chirp: Average responses were calculated based on the mean number of spikes during the stimulus across  
775 10 trials.

776 Spot-size tuning curve: Firing rates were background subtracted and peak responses during the first 0.4 s  
777 after each stimulus onset were calculated and used to plot a spot-size tuning curve.

778 DSI: Direction selectivity was calculated as for the *in-vivo* recordings. Firing rates were background  
779 subtracted and peak responses during the first 1 s after each stimulus onset were calculated. The direction  
780 selectivity of a ganglion cell was defined as the vector sum of these peak responses for each of the 8  
781 different directions  $\alpha$ . These 8 response measurements  $R_k$  were normalized to the maximum and the DSI  
782 was calculated according to:  $\sum_k R_k \cdot e^{a_{ik}} / \sum_k R_k$ .

#### 783 **Comparison of in-vitro and in-vivo data**

784 To compare the response properties of different retinal ganglion cell types and neurons in the Pbg and  
785 pulvinar, we calculated z-scores for each responding neuron as described above. Median firing rates were  
786 plotted for the different brain nuclei and retinal ganglion cell types.

787 Latency measurements: For cells responding during the black expanding dot, firing rates were smoothed  
788 with a moving median and a window size of 150 ms. Then, the time to the maximal response amplitude  
789 was taken as a measurement for latency.

#### 790 **Cell body size measurements**

791 To separate the functional group  $x_i$  (ON alpha sustained cells) from group  $x$  (ON sustained and ON mini),  
792 we acquired a z-stack of most patched cells using the 2-photon setup. We then loaded the z-stack into Fiji,

793 calculated a maximal projection and used the ellipse tool to fit an ellipse to the cell body and measure its  
794 area.

795 **Statistics**

796 To compare dendritic tree diameter distributions, we applied the Kolmogorov-Smirnov test (kstest2  
797 function in MATLAB). Medians were compared by the Wilcoxon Ranksum test (ranksum function in  
798 MATLAB). We used both Pearson correlation and Spearman correlation (corr function in MATLAB) to  
799 test for significant gradients in the retinotopic distribution of dendritic tree diameters.

800



## 801 **References**

- 802 Aponte, Y., Atasoy, D., and Sternson, S.M. (2011). AGRP neurons are sufficient to orchestrate feeding  
803 behavior rapidly and without training. *Nat. Neurosci.* *14*, 351.
- 804 Badea, T.C., and Nathans, J. (2004). Quantitative analysis of neuronal morphologies in the mouse retina  
805 visualized by using a genetically directed reporter. *J. Comp. Neurol.* *480*, 331–351.
- 806 Baden, T., Berens, P., Franke, K., Román Rosón, M., Bethge, M., and Euler, T. (2016). The functional  
807 diversity of retinal ganglion cells in the mouse. *Nature* *529*, 345–350.
- 808 Bae, J.A., Mu, S., Kim, J.S., Briggman, K.L., Seung, H.S., Bae, J.A., Mu, S., Kim, J.S., Turner, N.L.,  
809 Tartavull, I., et al. (2018). Digital Museum of Retinal Ganglion Cells with Dense Anatomy and  
810 Physiology Resource Digital Museum of Retinal Ganglion Cells with Dense Anatomy and Physiology.  
811 1293–1306.
- 812 Bleckert, A., Schwartz, G.W., Turner, M.H., Rieke, F., and Wong, R.O.L. (2014). Visual space is  
813 represented by nonmatching topographies of distinct mouse retinal ganglion cell types. *Curr. Biol.* *24*,  
814 310–315.
- 815 Chandrasekaran, A.R., Shah, R.D., and Crair, M.C. (2007). Developmental Homeostasis of Mouse  
816 Retinocollicular Synapses. *J. Neurosci.* *27*, 1746–1755.
- 817 Chen, S.-K., Badea, T.C., and Hattar, S. (2011). Photoentrainment and pupillary light reflex are mediated  
818 by distinct populations of ipRGCs. *Nature* *476*, 92–95.
- 819 Coombs, J., van der List, D., Wang, G.Y., and Chalupa, L.M. (2006). Morphological properties of mouse  
820 retinal ganglion cells. *Neuroscience* *140*, 123–136.
- 821 Coupé, P., Munz, M., Manjón, J. V, Ruthazer, E.S., and Louis Collins, D. (2012). A CANDLE for a  
822 deeper in vivo insight. *Med. Image Anal.* *16*, 849–864.
- 823 Cruz-Martín, A., El-Danaf, R., Osakada, F., Sriram, B., Dhande, O., Nguyen, P., Callaway, E., Ghosh, A.,  
824 and Huberman, A. (2014). A dedicated circuit links direction-selective retinal ganglion cells to the  
825 primary visual cortex. *Nature* *507*, 358–361.
- 826 Dhande, O.S., Estevez, M.E., Quattrochi, L.E., El-Danaf, R.N., Nguyen, P.L., Berson, D.M., and  
827 Huberman, A.D. (2013). Genetic dissection of retinal inputs to brainstem nuclei controlling image  
828 stabilization. *J. Neurosci.* *33*, 17797–17813.
- 829 Dhande, O.S., Stafford, B.K., Lim, J.-H.A., and Huberman, A.D. (2015). Contributions of Retinal  
830 Ganglion Cells to Subcortical Visual Processing and Behaviors. *Annu. Rev. Vis. Sci.* *1*, 291–328.
- 831 Dhawale, A.K., Smith, M.A., and Ölveczky, B.P. (2017). The Role of Variability in Motor Learning.  
832 *Annu. Rev. Neurosci.* *40*, 479–498.
- 833 Ellis, E.M., Gauvain, G., Sivyver, B., and Murphy, G.J. (2016). Shared and distinct retinal input to the  
834 mouse superior colliculus and dorsal lateral geniculate nucleus. *J. Neurophysiol.* *116*, 602–610.
- 835 Evans, D.A., Stempel, A.V., Vale, R., Ruehle, S., Lefler, Y., and Branco, T. (2018). Escape Decisions.  
836 *Nature*.
- 837 Farrow, K., and Masland, R.H. (2011). Physiological clustering of visual channels in the mouse retina. *J.*  
838 *Neurophysiol.* *105*, 1516–1530.
- 839 Farrow, K., Teixeira, M., Szikra, T., Viney, T.J., Balint, K., Yonehara, K., and Roska, B. (2013). Ambient  
840 illumination toggles a neuronal circuit switch in the retina and visual perception at cone threshold. *Neuron*  
841 *78*, 325–338.
- 842 De Franceschi, G., Vivattanasarn, T., Saleem, A.B., and Solomon, S.G. (2016). Vision Guides Selection  
843 of Freeze or Flight Defense Strategies in Mice. *Curr. Biol.* *26*, 2150–2154.
- 844 Frey, B.J., and Dueck, D. (2007). Clustering by passing messages between data points. *Science* *315*, 972–  
845 976.
- 846 Gale, S.D., and Murphy, G.J. (2014). Distinct representation and distribution of visual information by

- 847 specific cell types in mouse superficial superior colliculus. *J. Neurosci.* *34*, 13458–13471.
- 848 Gale, S.D., and Murphy, G.J. (2016). Active Dendritic Properties and Local Inhibitory Input Enable  
849 Selectivity for Object Motion in Mouse Superior Colliculus Neurons. *J. Neurosci.* *36*, 9111–9123.
- 850 Gale, S.D., and Murphy, G.J. (2018). Distinct cell types in the superficial superior colliculus project to the  
851 dorsal lateral geniculate and lateral posterior thalamic nuclei. *J. Neurophysiol.* *120*, 1286–1292.
- 852 Gandhi, N.J., and Katnani, H.A. (2011). Motor functions of the superior colliculus. *Annu. Rev. Neurosci.*  
853 *34*, 205–231.
- 854 Glickfeld, L.L., Andermann, M.L., Bonin, V., and Reid, R.C. (2013). Cortico-cortical projections in  
855 mouse visual cortex are functionally target specific. *Nat. Neurosci.* *16*, 219.
- 856 Hammer, S., Monavarfeshani, A., Lemon, T., Su, J., and Fox, M.A. (2015). Multiple Retinal Axons  
857 Converge onto Relay Cells in the Adult Mouse Thalamus. *Cell Rep.* *12*, 1575–1583.
- 858 Han, Y., Kebschull, J.M., Campbell, R.A.A., Cowan, D., Imhof, F., Zador, A.M., and Mrsic-Flogel, T.D.  
859 (2017). A single-cell anatomical blueprint for intracortical information transfer from primary visual  
860 cortex. *BioRxiv* 148031.
- 861 Hippenmeyer, S., Vrieseling, E., Sigrist, M., Portmann, T., Laengle, C., Ladle, D.R., and Arber, S. (2005).  
862 A developmental switch in the response of DRG neurons to ETS transcription factor signaling. *PLoS Biol.*  
863 *3*, e159.
- 864 Hofbauer, A., and Dräger, U.C. (1985). Depth segregation of retinal ganglion cells projecting to mouse  
865 superior colliculus. *J. Comp. Neurol.* *234*, 465–474.
- 866 Hong, W., Kim, D.-W., and Anderson, D.J. (2018). Antagonistic Control of Social versus Repetitive Self-  
867 Grooming Behaviors by Separable Amygdala Neuronal Subsets. *Cell* *158*, 1348–1361.
- 868 Huberman, A.D., Manu, M., Koch, S.M., Susman, M.W., Lutz, A.B., Ullian, E.M., Baccus, S.A., and  
869 Barres, B.A. (2008). Architecture and Activity-Mediated Refinement of Axonal Projections from a  
870 Mosaic of Genetically Identified Retinal Ganglion Cells. *Neuron* *59*, 425–438.
- 871 Jun, J.J., Steinmetz, N.A., Siegle, J.H., Denman, D.J., Bauza, M., Barbarits, B., Lee, A.K., Anastassiou,  
872 C.A., Andrei, A., Aydin, C., et al. (2017). Fully Integrated Silicon Probes for High-Density Recording of  
873 Neural Activity. *Nature in press*, 232–236.
- 874 Kay, J.N., De la Huerta, I., Kim, I.-J., Zhang, Y., Yamagata, M., Chu, M.W., Meister, M., and Sanes, J.R.  
875 (2011). Retinal Ganglion Cells with Distinct Directional Preferences Differ in Molecular Identity,  
876 Structure, and Central Projections. *J. Neurosci.* *31*, 7753–7762.
- 877 Kleiner, M., Brainard, D.H., Pelli, D.G., Broussard, C., Wolf, T., and Niehorster, D. (2007). What’s new  
878 in Psychtoolbox-3? *Perception* *36*, S14.
- 879 Kong, J.H., Fish, D.R., Rockhill, R.L., and Masland, R.H. (2005). Diversity of ganglion cells in the  
880 mouse retina: Unsupervised morphological classification and its limits. *J. Comp. Neurol.* *489*, 293–310.
- 881 Krieger, B., Qiao, M., Rousso, D.L., Sanes, J.R., and Meister, M. (2017). Four alpha ganglion cell types  
882 in mouse retina: Function, structure, and molecular signatures. *PLoS One* *12*, 1–21.
- 883 Liang, L., Fratzl, A., Goldey, G., Ramesh, R.N., Sugden, A.U., Morgan, J.L., Chen, C., and Andermann,  
884 M.L. (2018). A Fine-Scale Functional Logic to Convergence from Retina to Thalamus. *Cell* *173*, 1343–  
885 1355.e24.
- 886 Linden, R., and Perry, V.H. (1983). Massive retinotectal projection in rats. *Brain Res.* *272*, 145–149.
- 887 Lorente de No, R. (1933). Vestibulo-ocular-reflex arc. *Arch. Neurol. Psychiatry Chicago* *30*, 245–291.
- 888 Lundberg, A. (1979). Multisensory Control of Spinal Reflex Pathways. *Prog. Brain Res.* *50*, 11–28.
- 889 Van Der Maaten, L.J.P., and Hinton, G.E. (2008). Visualizing high-dimensional data using t-sne. *J. Mach.*  
890 *Learn. Res.* *9*, 2579–2605.
- 891 Madisen, L., Zwingman, T.A., Sunkin, S.M., Oh, S.W., Zariwala, H.A., Gu, H., Ng, L.L., Palmiter, R.D.,  
892 Hawrylycz, M.J., Jones, A.R., et al. (2010). A robust and high-throughput Cre reporting and

- 893 characterization system for the whole mouse brain. *Nat. Neurosci.* *13*, 133–140.
- 894 Martersteck, E.M., Hirokawa, K.E., Zeng, H., Sanes, J.R., Harris, J.A., Evarts, M., Bernard, A., Duan, X.,  
895 Li, Y., Ng, L., et al. (2017). Diverse Central Projection Patterns of Retinal Ganglion Cells. *Cell Rep.* *18*,  
896 2058–2072.
- 897 May, P.J. (2006). The mammalian superior colliculus: Laminar structure and connections. *Prog. Brain*  
898 *Res.* *151*, 321–378.
- 899 Milletari, F., Navan, N., and Ahmadi, S.-A. (2016). V-Net: Fully Convolutional Neural Networks for  
900 Volumetric Medical Image Segmentation. ArXiv.
- 901 Morgan, J.L., Berger, D.R., Wetzel, A.W., Lichtman, J.W., Morgan, J.L., Berger, D.R., Wetzel, A.W.,  
902 and Lichtman, J.W. (2016). Article The Fuzzy Logic of Network Connectivity in Mouse Visual Thalamus.  
903 *Cell* *165*, 192–206.
- 904 Münch, T. a, da Silveira, R.A., Siegert, S., Viney, T.J., Awatramani, G.B., and Roska, B. (2009).  
905 Approach sensitivity in the retina processed by a multifunctional neural circuit. *Nat. Neurosci.* *12*, 1308–  
906 1316.
- 907 Nath, A., and Schwartz, G.W. (2016). Cardinal Orientation Selectivity Is Represented by Two Distinct  
908 Ganglion Cell Types in Mouse Retina. *J. Neurosci.* *36*, 3208–3221.
- 909 Nath, A., and Schwartz, G.W. (2017). Electrical synapses convey orientation selectivity in the mouse  
910 retina. *Nat. Commun.* *8*, 2025.
- 911 Osakada, F., and Callaway, E.M. (2013). Design and generation of recombinant rabies virus vectors. *Nat.*  
912 *Protoc.* *8*, 1583–1601.
- 913 Peichl, L., Ott, H., and Boycott, B.B. (1987). Alpha ganglion cells in mammalian retinae. *Proc. R. Soc.*  
914 *Lond. B Biol Sci.* *231*.
- 915 Rompani, S.B., Mullner, F.E., Wanner, A., Zhang, C., Roth, C.N., Yonehara, K., Wanner, A., Zhang, C.,  
916 Roth, C.N., Yonehara, K., et al. (2017). Different Modes of Visual Integration in the Lateral Geniculate  
917 Nucleus Revealed by Single-Cell-Initiated Transsynaptic Tracing. *Neuron* *93*, 767–776.
- 918 Rose, T., Jaepel, J., Hübener, M., and Bonhoeffer, T. (2016). Cell-specific restoration of stimulus  
919 preference after monocular deprivation in the visual cortex. *Science* (80- ). *352*, 1319–1322.
- 920 Roska, B., and Werblin, F. (2001). Vertical interactions across ten parallel, stacked representations in the  
921 mammalian retina. *Nature* *410*, 583–587.
- 922 Sanes, J.R., and Masland, R.H. (2014). The Types of Retinal Ganglion Cells: Current Status and  
923 Implications for Neuronal Classification. *Annu. Rev. Neurosci.* *38*, 221–246.
- 924 Schindelin, J., Arganda-Carreras, I., Frise, E., Kaynig, V., Longair, M., Pietzsch, T., Preibisch, S., Rueden,  
925 C., Saalfeld, S., Schmid, B., et al. (2012). Fiji: An open-source platform for biological-image analysis.  
926 *Nat. Methods* *9*, 676–682.
- 927 Shang, C., Liu, Z., Chen, Z., Shi, Y., Wang, Q., Liu, S., Li, D., and Cao, P. (2015). A parvalbumin-  
928 positive excitatory visual pathway to trigger fear responses in mice. *Science* (80- ). *348*, 1472–1477.
- 929 Shang, C., Chen, Z., Liu, A., Li, Y., Zhang, J., Qu, B., Yan, F., Zhang, Y., Liu, W., Liu, Z., et al. (2018).  
930 Divergent midbrain circuits orchestrate escape and freezing responses to looming stimuli in mice. *Nat.*  
931 *Commun.* *9*, 1–17.
- 932 Staudt, T., Lang, M.C., Medda, R., Engelhardt, J., and Hell, S.W. (2007). 2,2'-thiodiethanol: a new water  
933 soluble mounting medium for high resolution optical microscopy. *Microsc. Res. Tech.* *70*, 1–9.
- 934 Sterratt, D.C., Lyngholm, D., Willshaw, D.J., and Thompson, I.D. (2013). Standard Anatomical and  
935 Visual Space for the Mouse Retina: Computational Reconstruction and Transformation of Flattened  
936 Retinae with the Retistruct Package. *PLoS Comput. Biol.* *9*.
- 937 Sumbul, U., Zlateski, A., Vishwanathan, A., Masland, R.H., and Seung, H.S. (2014). Automated  
938 computation of arbor densities: a step toward identifying neuronal cell types. *Front. Neuroanat.* *8*, 139.

- 939 Sümbül, U., Song, S., McCulloch, K., Becker, M., Lin, B., Sanes, J.R., Masland, R.H., and Seung, H.S.  
940 (2014). A genetic and computational approach to structurally classify neuronal types. *Nat. Commun.* 5,  
941 3512.
- 942 Sun, W., Li, N., and He, S. (2002). Large-scale morphological survey of mouse retinal ganglion cells. *J.*  
943 *Comp. Neurol.* 451, 115–126.
- 944 Tinbergen, N. (1951). *The study of instinct* (Oxford: Clarendon Press).
- 945 Vaney, D.I., Peichl, L., Wässle, H., and Illing, R.B. (1981). Almost all ganglion cells in the rabbit retina  
946 project to the superior colliculus. *Brain Res.* 212, 447–453.
- 947 Volgyi, B., Chheda, S., and Bloomfield, S.A. (2009). Tracer coupling patterns of the ganglion cell  
948 subtypes in the mouse retina. *J. Comp. Neurol.* 512, 664–687.
- 949 Wei, P., Liu, N., Zhang, Z., Liu, X., Tang, Y., He, X., Wu, B., Zhou, Z., Liu, Y., Li, J., et al. (2015).  
950 Processing of visually evoked innate fear by a non-canonical thalamic pathway. *Nat. Commun.* 6, 6756.
- 951 Yger, P., Spampinato, G.L.B., Esposito, E., Lefebvre, B., Deny, S., Gardella, C., Stimberg, M., Jetter, F.,  
952 Zeck, G., Picaud, S., et al. (2018). A spike sorting toolbox for up to thousands of electrodes validated  
953 with ground truth recordings in vitro and in vivo. *Elife* 7, 1–23.
- 954 Yonehara, K., Farrow, K., Ghanem, A., Hillier, D., Balint, K., Teixeira, M., Jüttner, J., Noda, M., Neve,  
955 R., Conzelmann, K.K., et al. (2013). The first stage of cardinal direction selectivity is localized to the  
956 dendrites of retinal ganglion cells. *Neuron* 79, 1078–1085.
- 957 Zeng, H., and Sanes, J.R. (2017). Neuronal cell-type classification: Challenges, opportunities and the path  
958 forward. *Nat. Rev. Neurosci.* 18, 530–546.
- 959 Zhang, Y., Kim, I.-J., Sanes, J.R., and Meister, M. (2012). The most numerous ganglion cell type of the  
960 mouse retina is a selective feature detector. *Proc. Natl. Acad. Sci. U. S. A.* 109, E2391-8.
- 961 Zhang, Z., Liu, W.-Y., Diao, Y.-P., Xu, W., Zhong, Y.-H., Zhang, J.-Y., Lazarus, M., Liu, Y.-Y., Qu, W.-  
962 M., and Huang, Z.-L. (2019). Superior Colliculus GABAergic Neurons Are Essential for Acute Dark  
963 Induction of Wakefulness in Mice. *Curr. Biol.* 1–8.
- 964
- 965

966 **Supplementary Information**

967 **Figure S1. Viral tracing with EnvA-coated rabies virus and herpes-simplex-virus (HSV).**

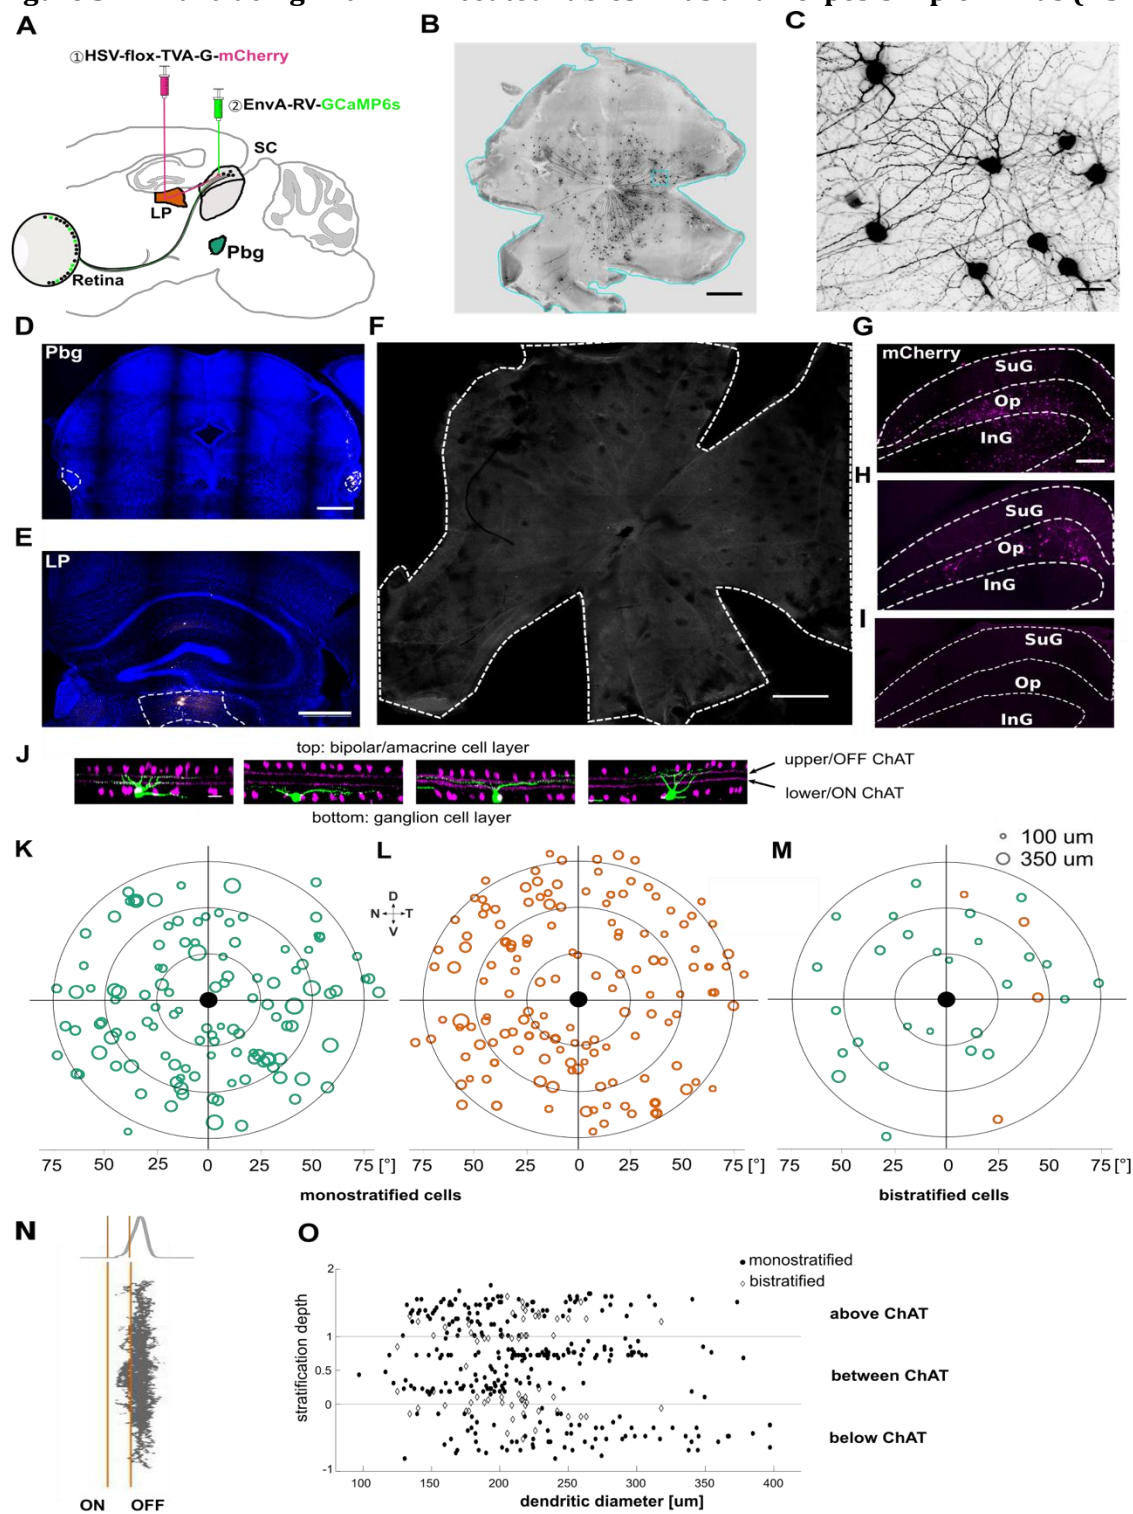

968 **Figure S1 related to Figure 1: Viral tracing with EnvA-coated rabies virus and herpes-simplex-**  
 969 **virus (HSV).** **A)** Injection strategy for labelling of the circuit connecting the retina to the parabigeminal  
 970 nucleus, via the superior colliculus. **B)** Example retina with labelled ganglion cells innervating the  
 971

972 colliculo-parabigeminal circuit. Scale bar = 500  $\mu\text{m}$ . **C)** Zoomed-in version of C. Scale bar = 50  $\mu\text{m}$ . **D)**  
973 Histological section after parabigeminal nucleus injection. The pipette was coated with a fluorescent dye  
974 (DiD), and the fluorescent signal coincides with the location of the parabigeminal nucleus indicated with  
975 a dashed box. **E)** Histological section after pulvinar injection. **F)** The whole-mount retina stained with  
976 antibody for GCaMP6s after EnvA-coated SAD- $\Delta$ G-GCaMP6s rabies virus injection to superior  
977 colliculus alone without first injection of HSV. No labelled cells are observed after 11 days injection.  
978 Scale bar: 500 $\mu\text{m}$ . **G)** Injection of non-conditional HSV to parabigeminal nuclei labelled superior  
979 colliculus neurons. Neurons were stained with anti-mCherry antibody, showed in magenta. **H)** Injection of  
980 conditional HSV to pulvinar labelled superior colliculus neurons. Neurons were stained with anti-  
981 mCherry antibody, showed in magenta. **I)** Injection of conditional HSV to wild-type mouse. Very few  
982 labelled cells are observed after 21 days injection. Scale bar = 200 $\mu\text{m}$ . **J)** Side-view of z-stack scans of  
983 four example retinal ganglion cells (green) and the ChAT-bands (magenta). Scale bar = 20  $\mu\text{m}$ . **K-M)**  
984 Retinal position and dendritic tree diameter of retinal ganglion cells that are part of the colliculo-  
985 parabigeminal circuit (K), cells innervating the colliculo-pulvinar circuit (L), and bistratified ganglion  
986 cells of both circuits (M). To determine if the differences in size between the colliculo-Pbg and colliculo-  
987 pulvinar circuit are due to a bias in the retinotopic location of the sampled ganglion cells, we analysed the  
988 spatial distribution of the labelled neurons across the retina. For each circuit we sampled evenly from  
989 each retinal quadrant (21.9% naso-dorsal, 26.6% dorso-temporal, 24.9% temporo-ventral, 26.9% ventro-  
990 nasal. In addition, we sampled at all retinal eccentricities: 16% of labelled ganglion cells were sampled  
991 from the central third of the retina (within 30° of the optic nerve), 48% from the middle third (30°-60°  
992 from the optic nerve) and 36% from the peripheral third (60°-90° from the optic nerve). This indicates  
993 that the observed difference in size between the two circuits is not due to a sampling bias in retinotopic  
994 location. N = nasal, D = dorsal, T = temporal, V = ventral. The optic nerve is indicated with a black disc.  
995 **N)** The distribution of the dendritic tree in depth was summed to create a stratification profile. **O)**  
996 Stratification depth and dendritic tree diameter of all 301 labelled retinal ganglion cells from both  
997 experimental conditions.  
998

999 **Figure S2. All 301 cells in their corresponding cluster**  
1000

**A cluster 1**

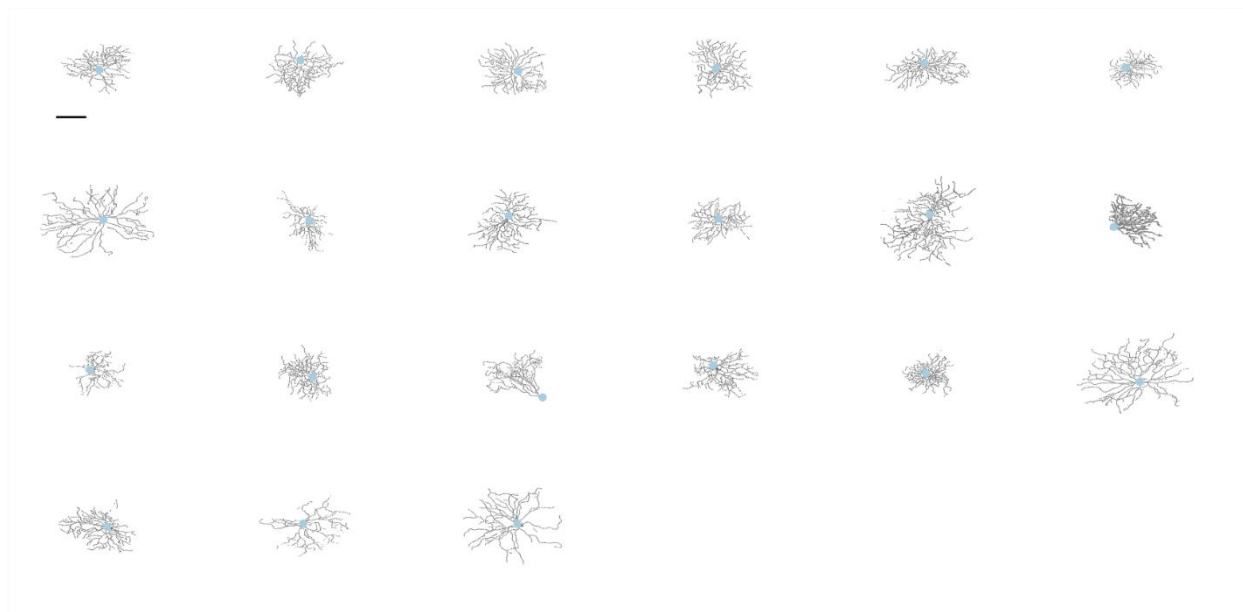

**B cluster 2**

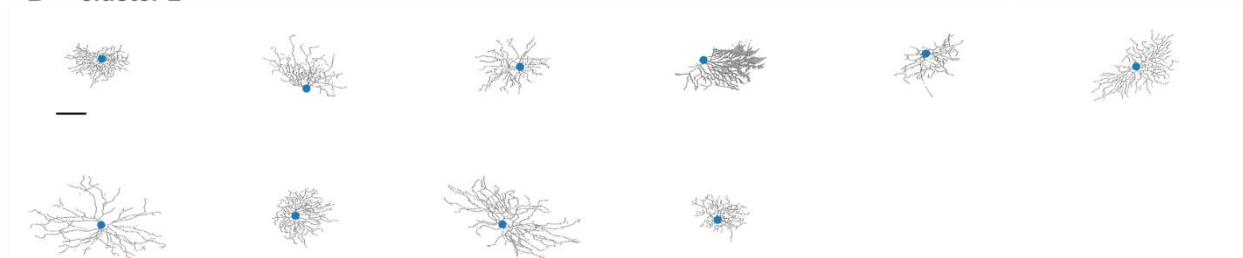

**C cluster 3**

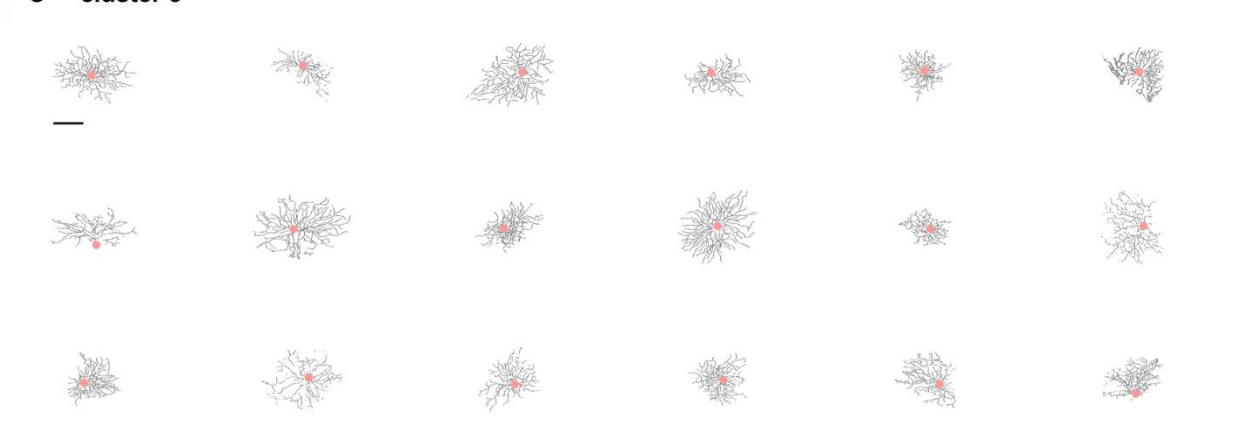

1001  
1002

**D cluster 4**

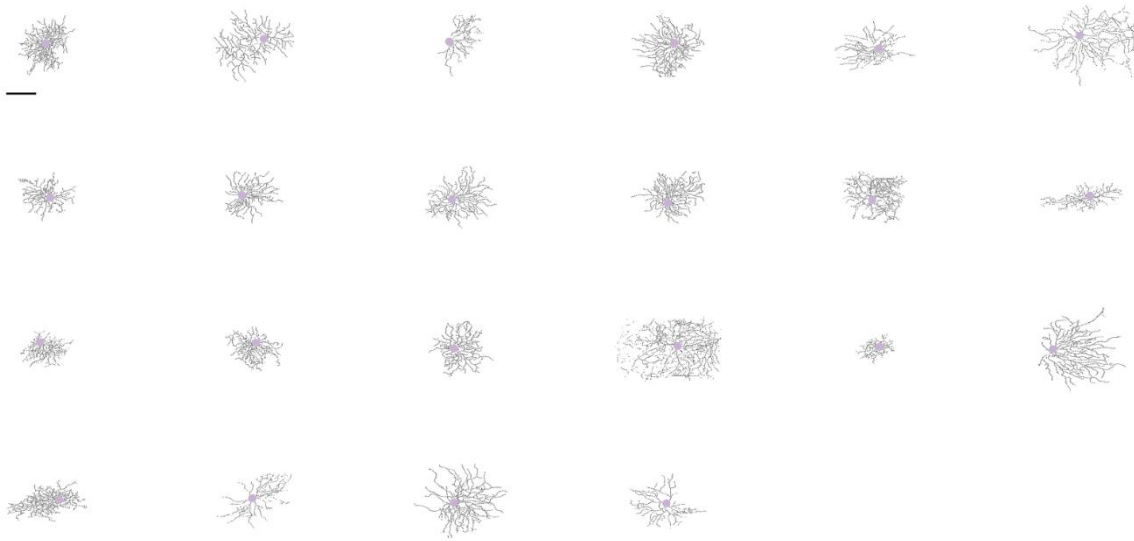

**E cluster 5**

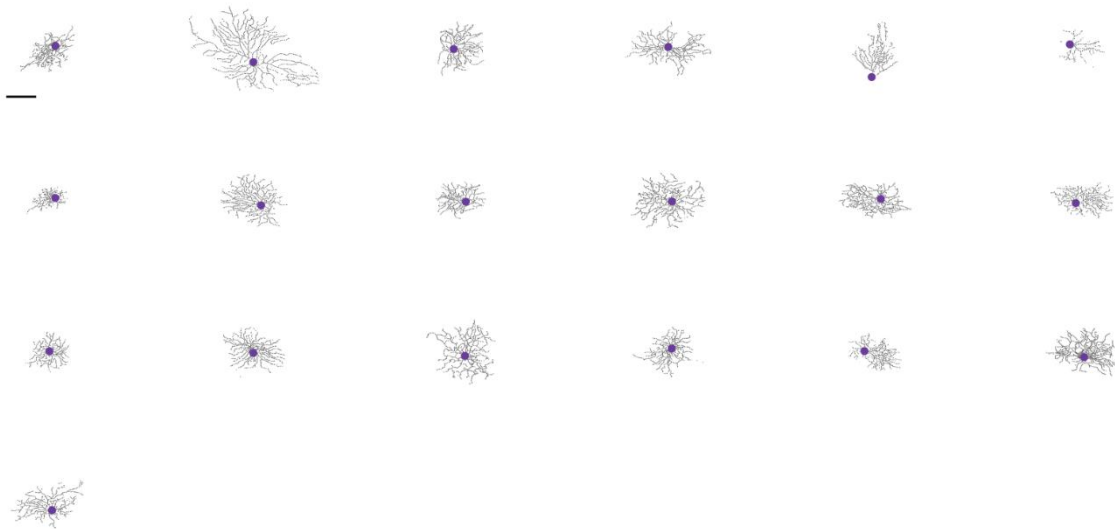

1003

1004



**F cluster 6**

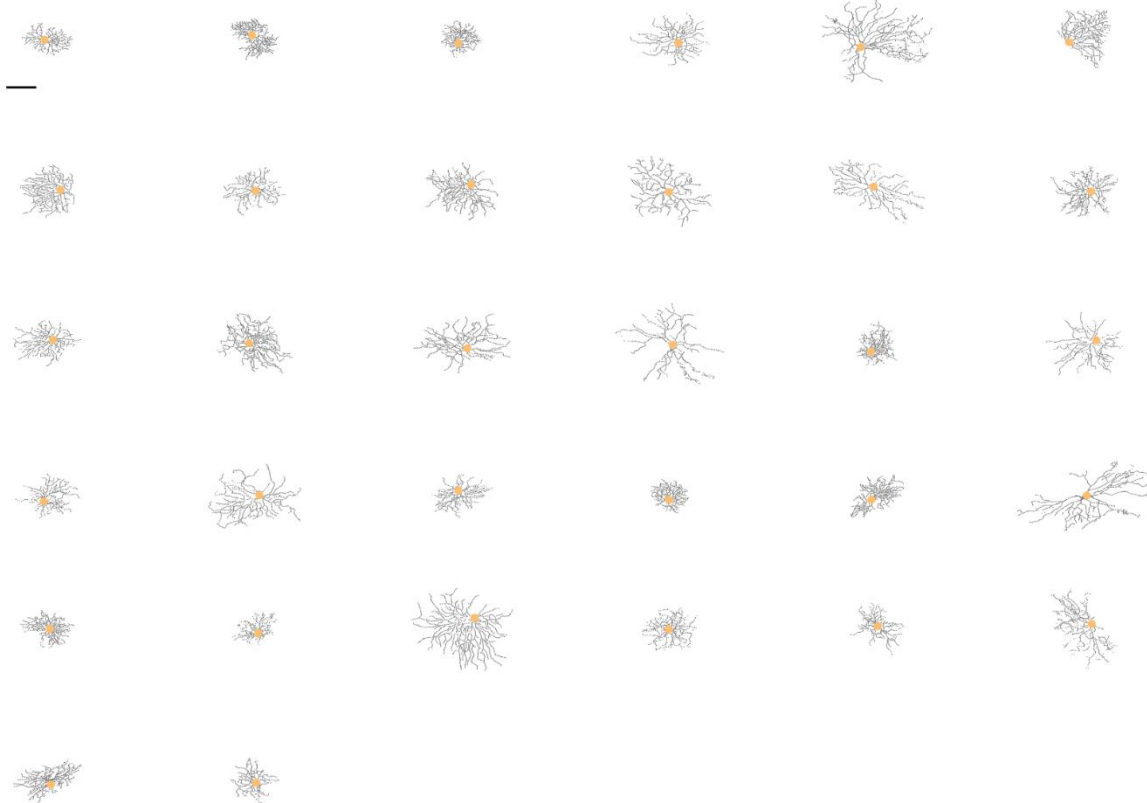

**G cluster 7**

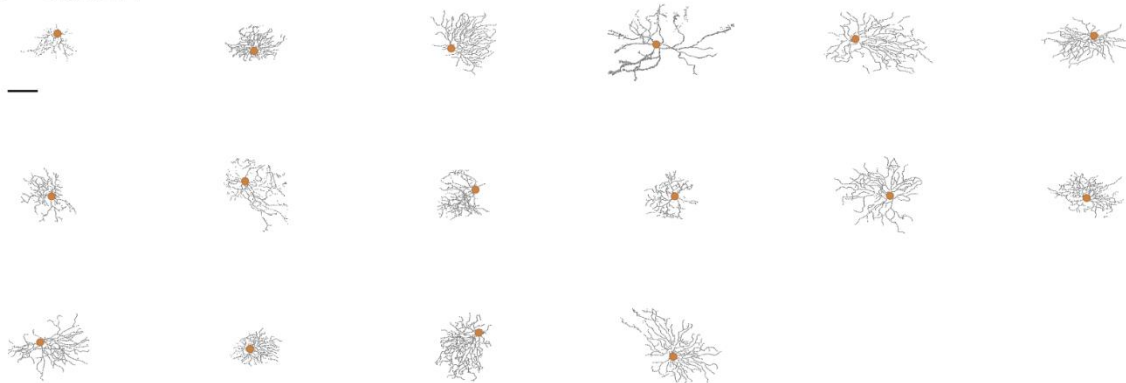

**H cluster 8**

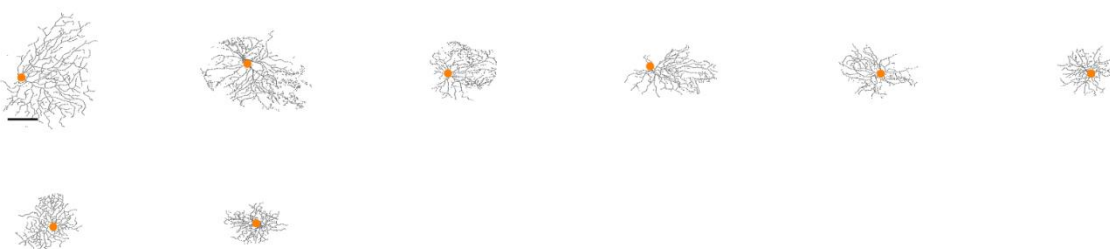

1005  
1006

I cluster 9

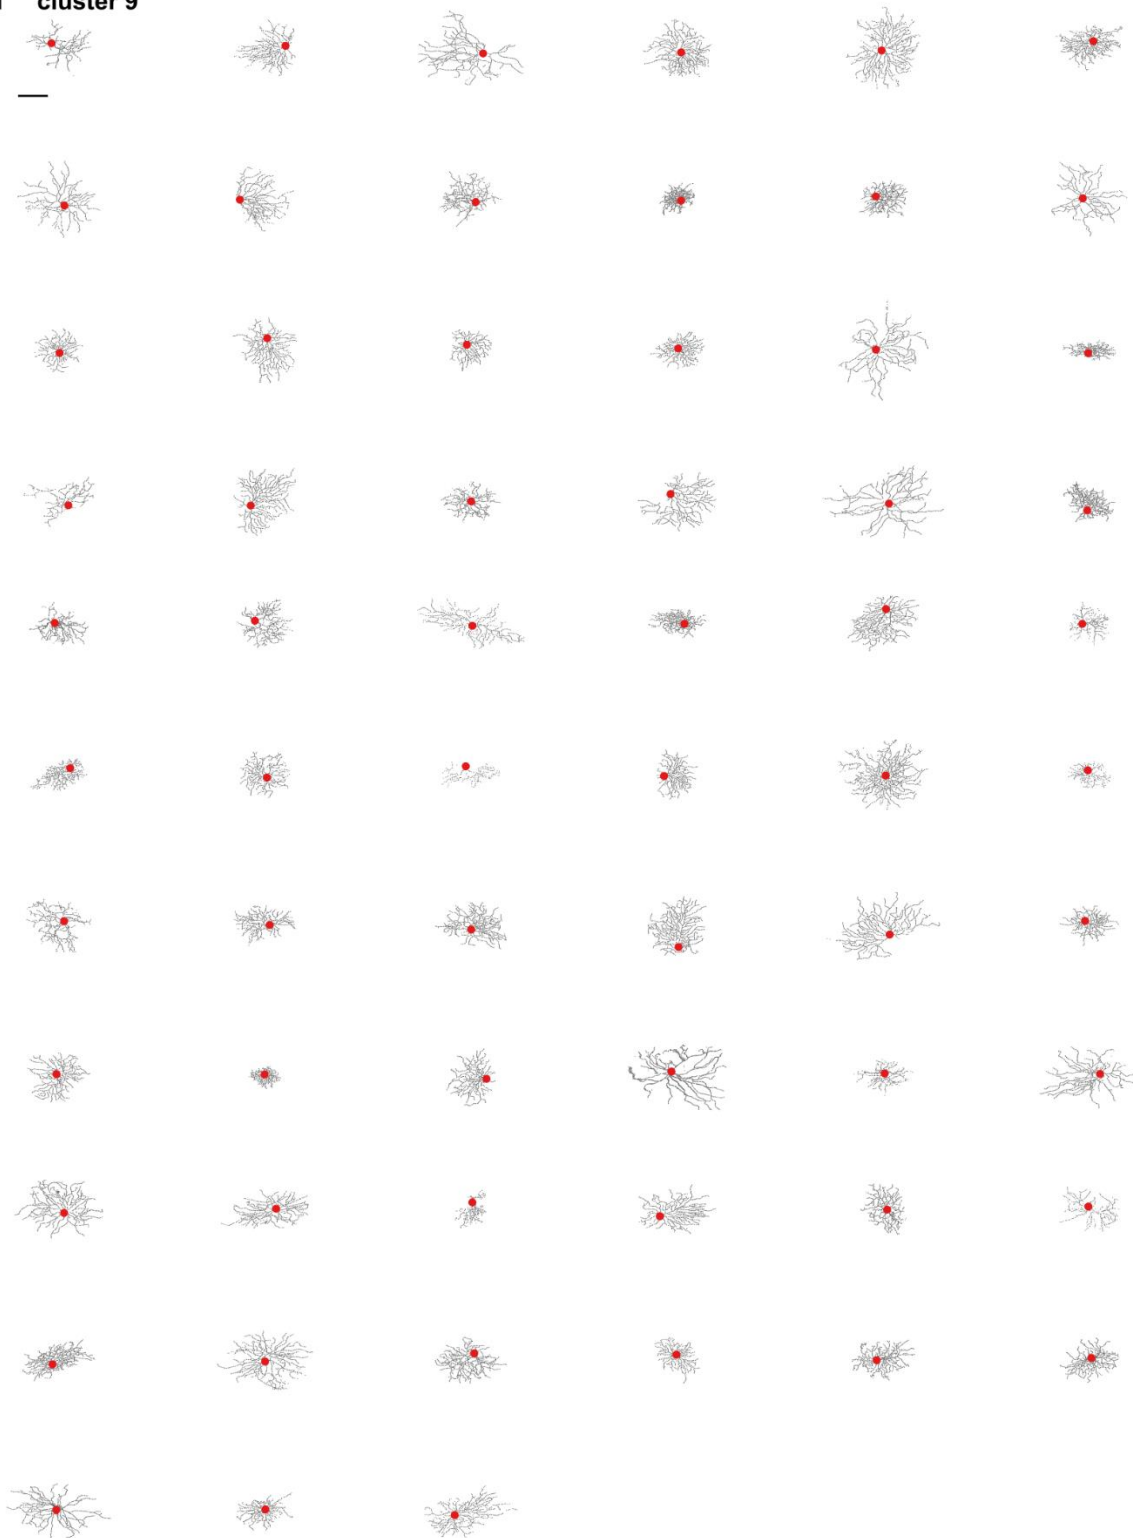

1007  
1008

1009

**J cluster 10**

---

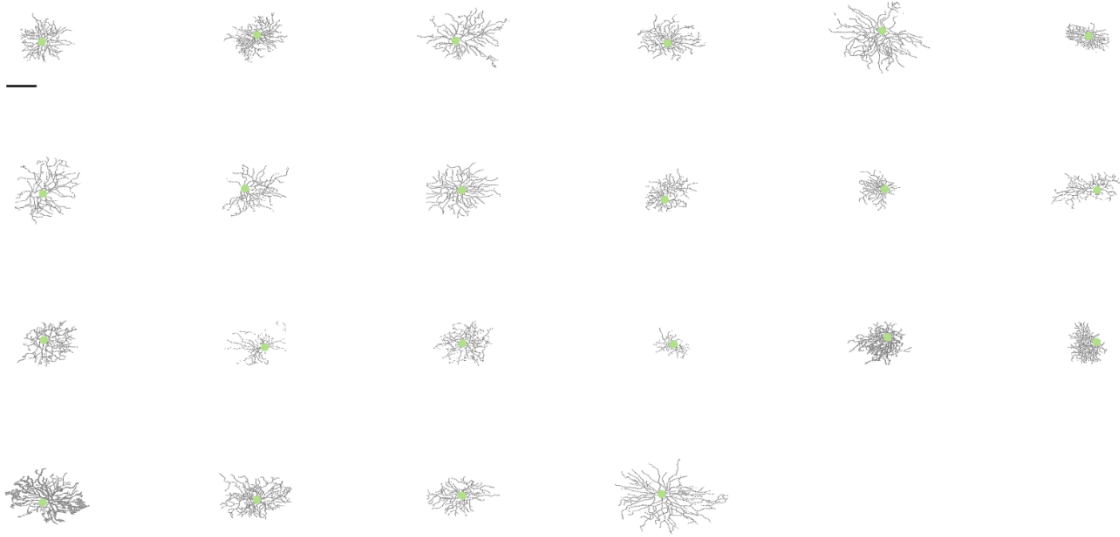

1010

1011

**K cluster 11**

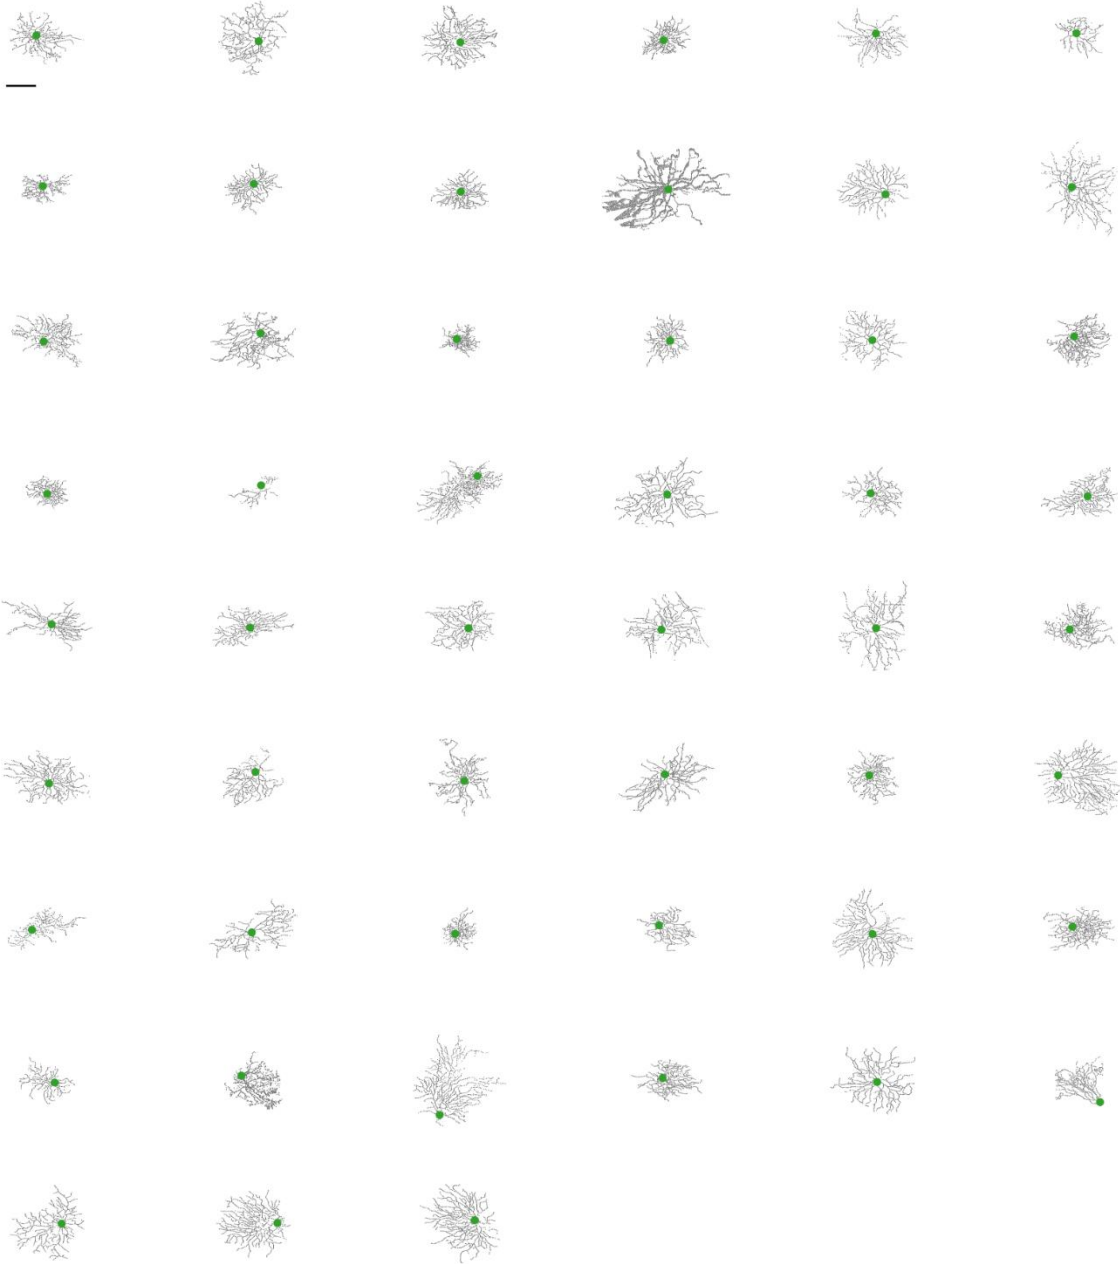

1012

1013

**L cluster 12**

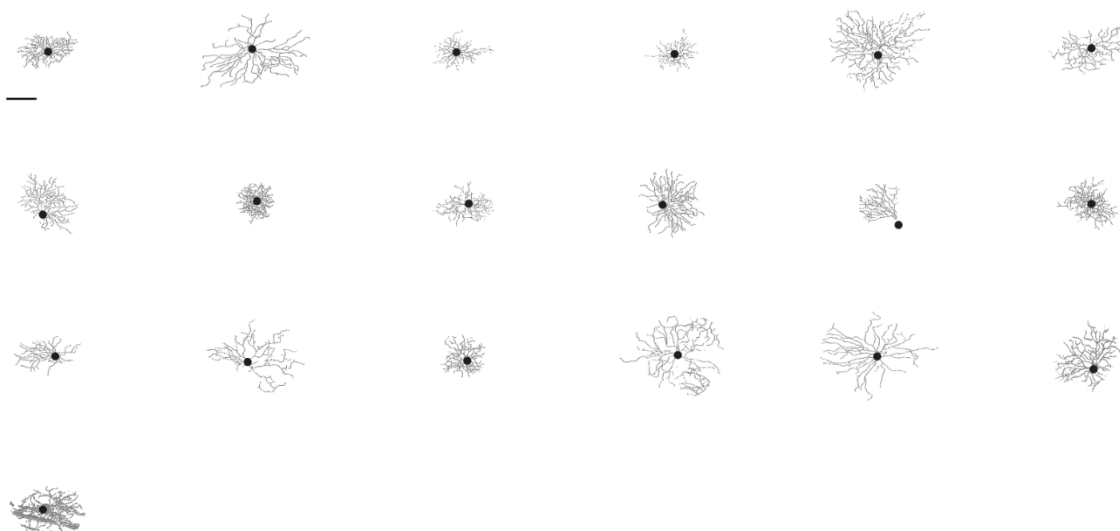

1014  
1015 **Figure S2 related to Figure 2. All 301 cells in their corresponding cluster.** Cells are sorted by their  
1016 similarity to the cluster centre (from closest do most distant). Scale bar: 100  $\mu\text{m}$ .  
1017

1018 **Figure S3. Clustering validation and dendritic tree size variability**

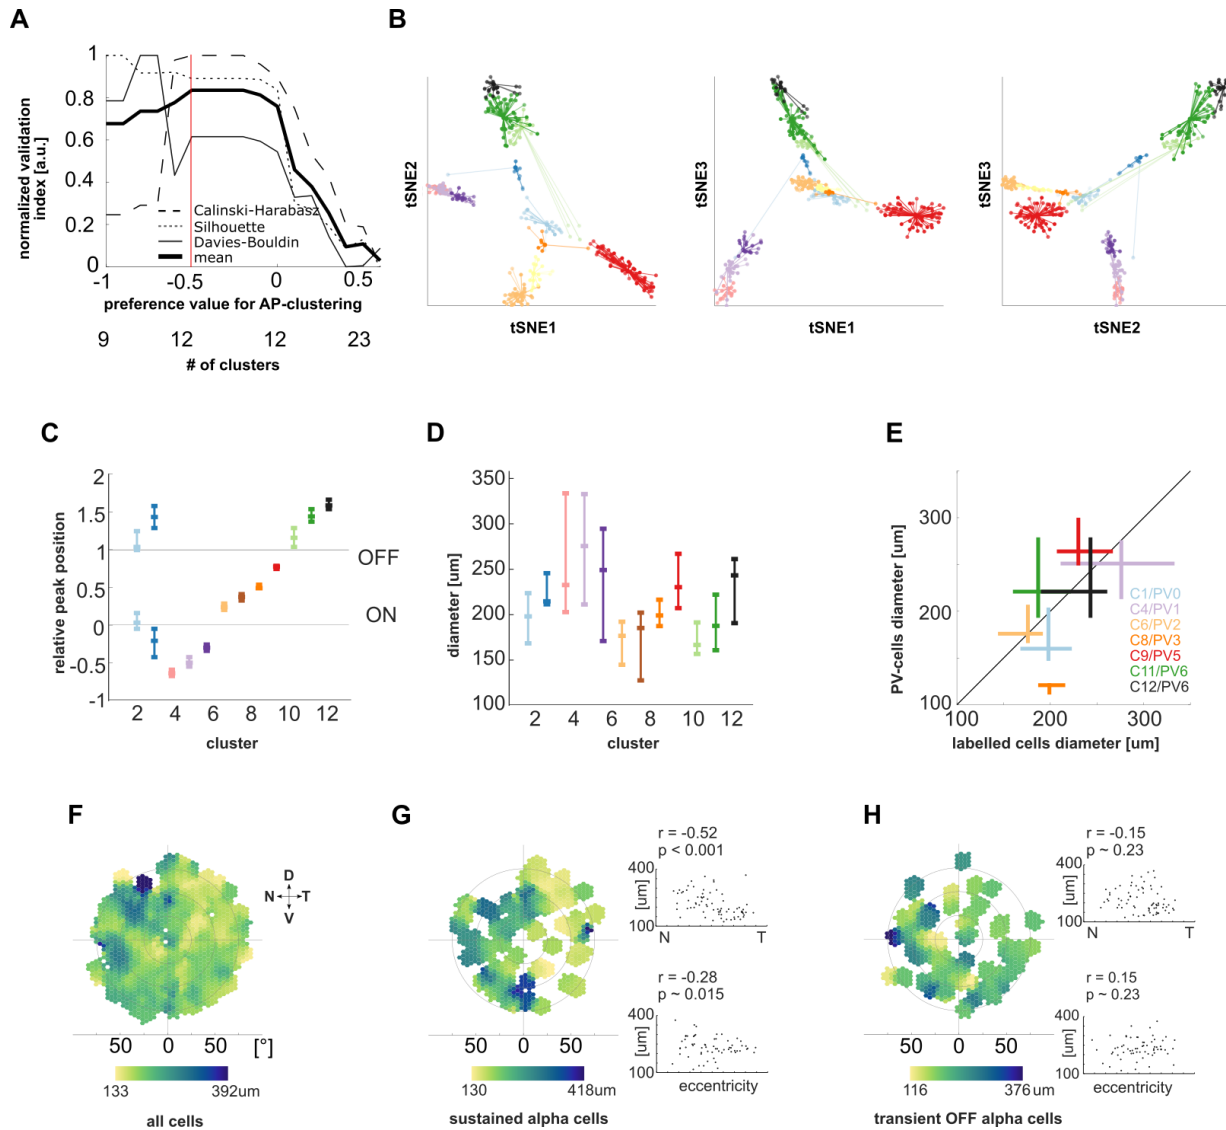

1019 **Figure S3 related to Figure 3. Clustering validation and dendritic tree size variability.** A) Validation  
 1020 of clustering result. Three normalized validation indices (Calbinski-Harabasz, Silhouette, Davies-  
 1021 Bouldin) and their mean are shown. The clustering result taken for further analysis is marked with a red  
 1022 line. B) Visualization of the cells in the 12 clusters using t-distributed stochastic neighbor embedding  
 1023 (tSNE). Each plot shows the distances between individual data points. Transparency of the lines shows  
 1024 the similarity between two data points based on the affinity-propagation clustering. Colours represent the  
 1025 same clusters as shown in Figure 3. To test if an individual cluster contains retinal ganglion cells of more  
 1026 than one type, we compared the dendritic tree location and size variances within each group. C) Peak of  
 1027 stratification profile for each cluster (median and quartiles). D) Dendritic tree diameter for cells in each  
 1028 cluster (median and quartiles). The dendritic field size can vary substantially between cells of a given  
 1029 cluster, where generally smaller cells have a narrower range of dendritic diameters (e.g. cluster 6 and  
 1030 cluster 10), while larger cells span a broader range of sizes (e.g. cluster 5 and cluster 12). E) Cell  
 1031 diameter median and quartiles of 7 clusters and the corresponding parvalbumin-positive (PV) cells

1032 (Farrow et al., 2013) that have a similar stratification depth and similar average size. **F)** Smoothed  
1033 distribution of dendritic field diameter of all labelled cells ( $n = 301$ ) at their retinotopic location. To  
1034 further investigate whether the within cluster variance in dendritic field size match the expected  
1035 retinotopic distribution, we compared the size distribution of alpha-cell clusters with those previously  
1036 reported (Bleckert et al., 2014; Krieger et al., 2017). When considering all 301 labelled cells, we find that  
1037 cells in the central retina tend to be smaller than in the periphery. **G)** Smoothed distribution of dendritic  
1038 field diameter of all cells in the sustained alpha clusters ( $n = 22$  sustained ON-cells in cluster 4 and  $n = 51$   
1039 OFF-cells in cluster 11), similar to published distributions (Bleckert et al., 2014). Top right: dendritic field  
1040 size along the naso-temporal axis. Spearman-correlation:  $r = -0.52$ ,  $p < 0.001$ ; Pearson-correlation:  $r = -$   
1041  $0.42$ ,  $p \sim 0.002$ . Bottom right: dendritic field size relative to eccentricity (from optic nerve to periphery).  
1042 Spearman-correlation:  $r = 0.28$ ,  $p \sim 0.015$ ; Pearson-correlation:  $r = -0.19$ ,  $p \sim 0.11$ . **H)** Smoothed  
1043 distribution of dendritic field diameter of the cells in the transient OFF-alpha cluster ( $n = 63$  in cluster 9).  
1044 The size distribution of transient OFF-alpha cells is much more homogeneous and centred than for  
1045 sustained alpha cells. Top right (naso-temporal axis): Spearman-correlation:  $r = -0.15$ ,  $p \sim 0.23$ ; Pearson-  
1046 correlation:  $r = -0.14$ ,  $p \sim 0.27$ . Bottom right (eccentricity): Spearman-correlation:  $r = 0.15$ ,  $p \sim 0.23$ ;  
1047 Pearson-correlation:  $r = 0.14$ ,  $p \sim 0.27$ .

1048

1049 **Figure S4. Targeted patch-clamp recording of the virus-labelled retinal ganglion cell.**

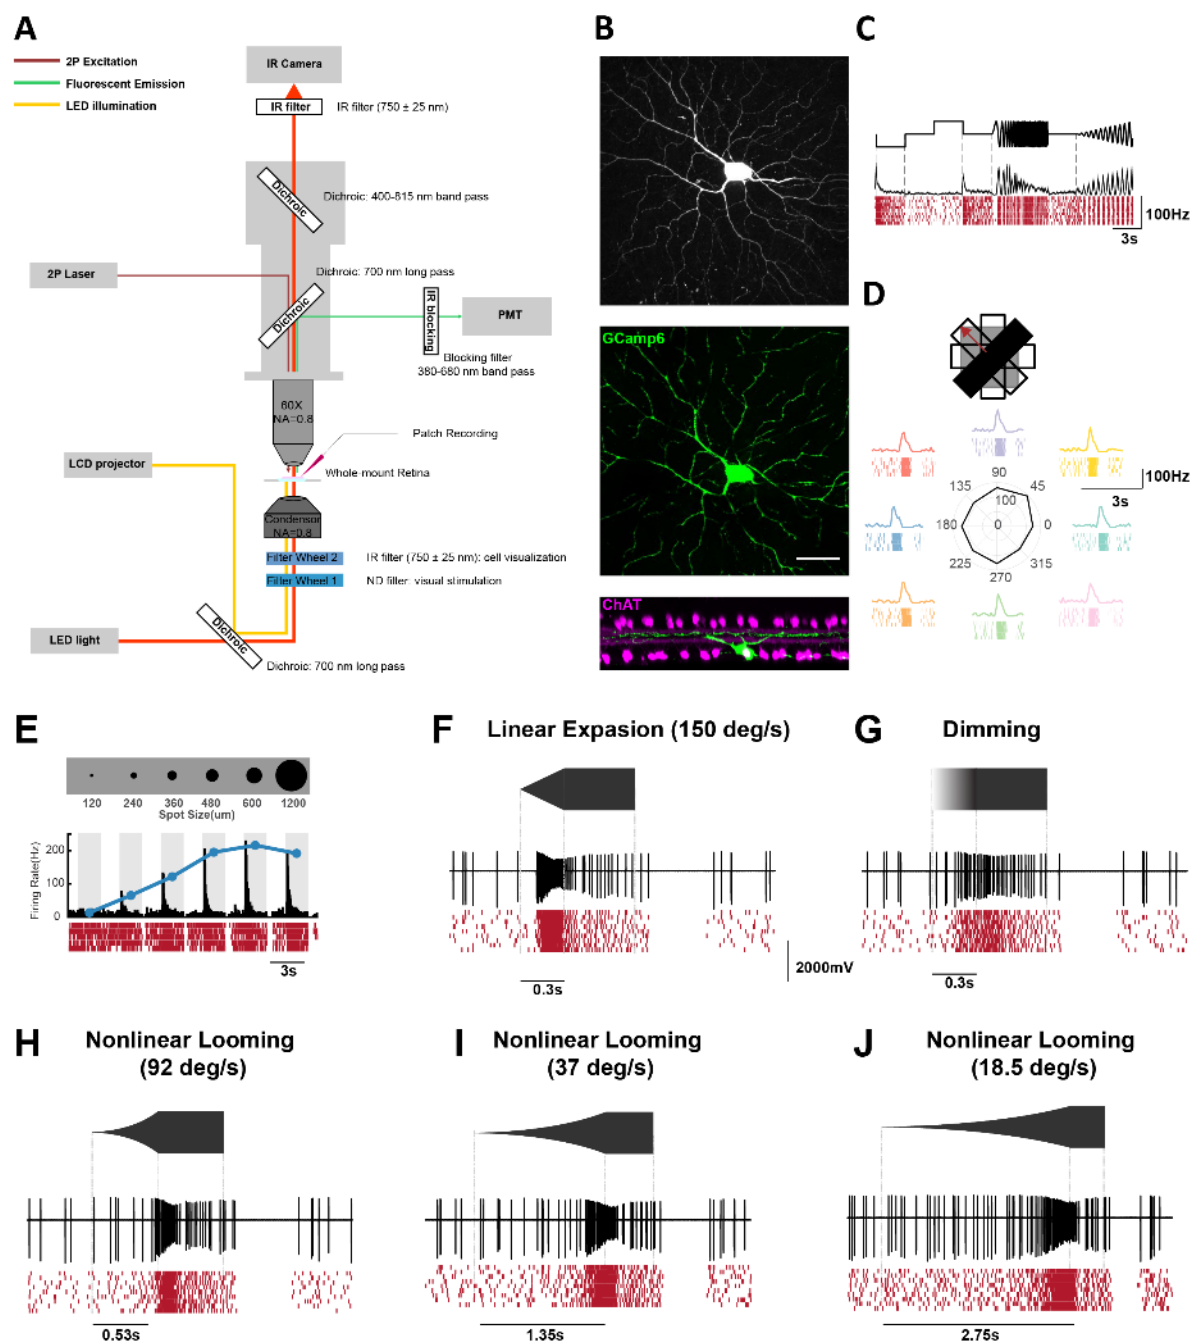

1050  
 1051 **Figure S4 related to Figure 5: Targeted patch-clamp recording of the virus-labelled retinal ganglion**  
 1052 **cell.** **A)** Schematic of the setup for the two-photon targeted patch-clamp recording. **B)** Top: Maximum  
 1053 intensity projection of a two-photon image stack showing GCaMP6-expressing cell after the rabies  
 1054 injection. En-face view (middle) and side-view (bottom) of a confocal microscope z-stack (maximum  
 1055 intensity projection) showing the same cell after the staining process (green: GCaMP6, magenta: ChAT).  
 1056 Scale bar: 50 μm. **C)** Response of this cell to the chirp stimulus. The black trace representing the mean  
 1057 firing rates (50 ms bins) across 10 trials, which are shown below in the raster plot (red). **D)** Response to



1058 the black fast moving bar. **E)** Response to spot stimuli consisting of a black spot presented for 2s with  
1059 120, 240, 360, 480, 600 and 1200  $\mu\text{m}$  diameter. The grey bars indicate stimulus duration. The blue line  
1060 represents the spot size tuning curve. **F)** Response to a linearly expanding black dot. **G)** Response to a  
1061 large dot that linearly dimmed from grey to black. **H-J)** Responses to non-linearly expanding black dots  
1062 at different speeds.

1063

1064

1065 **Figure S5. Parabigeminal and pulvinar responses to big-fast and chirp stimuli**

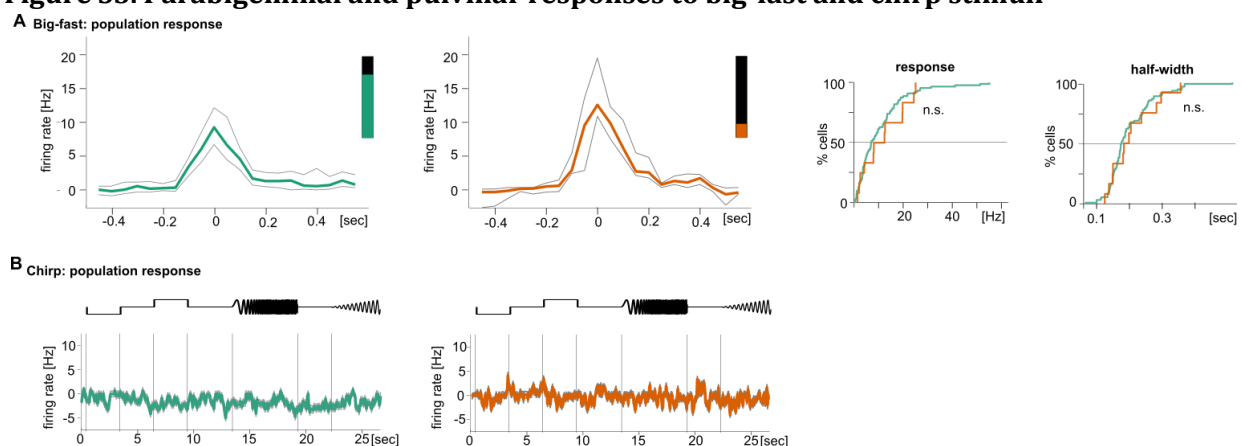

1066

1067

1068 **Figure S5 related to Figure 6: Parabigeminal and pulvinar responses to big-fast and chirp stimuli.**

1069 **A) Maximal amplitude response across all Pbg and pulvinar neurons to a big, fast moving black square.**

1070 **Right: Response amplitude distribution and half-width distribution. B) Population response to chirp**

1071 **stimulus.**

1072

1073 **Figure S6. Parabigeminal and pulvinar responses to expansion.**

1074

**Expansion, brain**

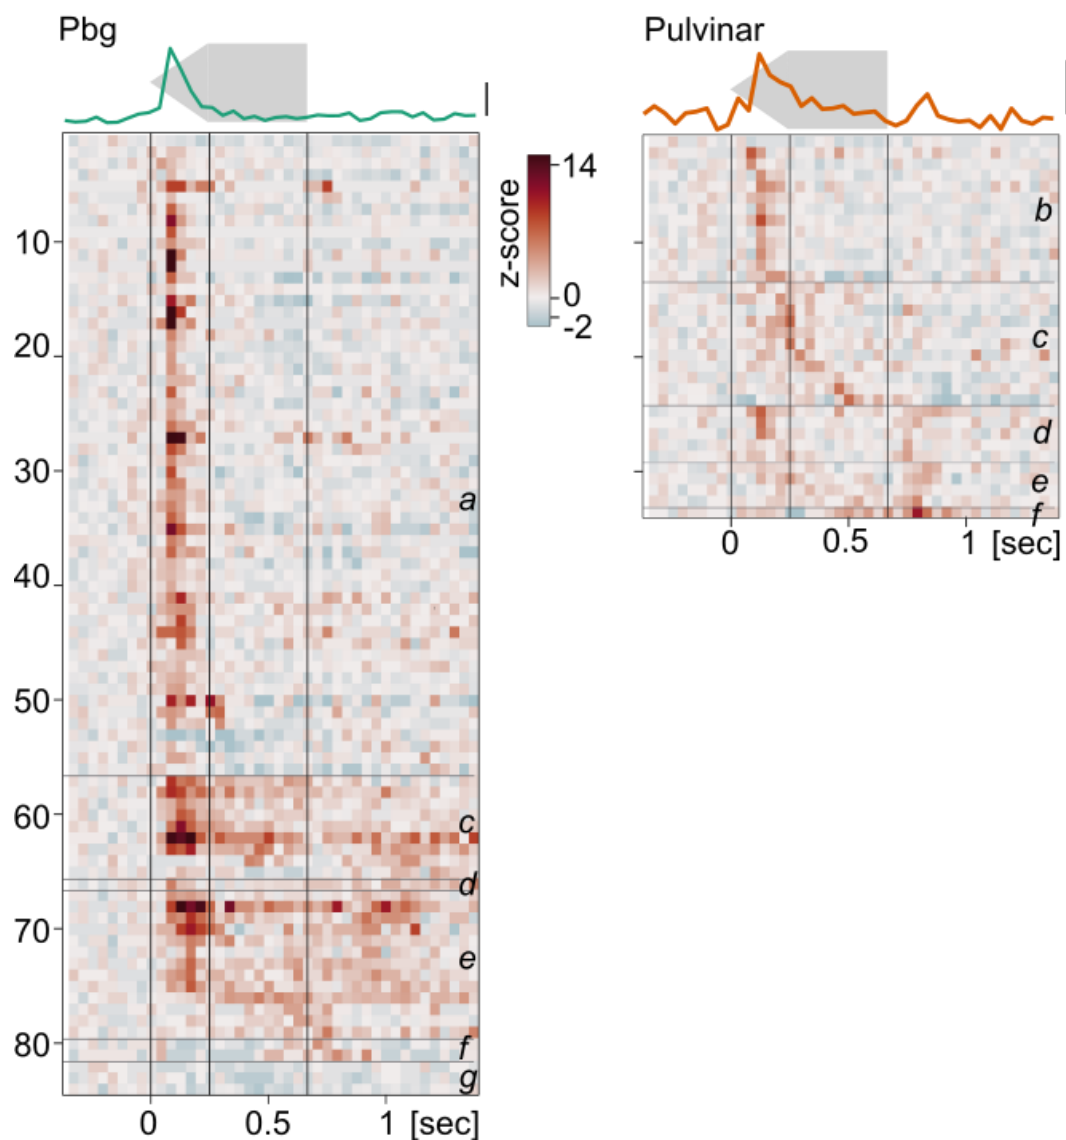

1075

1076

1077 **Figure S6 relates to Figure 7: Parabigeminal and pulvinar responses to expansion.** Heatmap of single  
1078 cell responses to an expanding dot for parabigeminal nucleus and pulvinar. Letters indicate cells  
1079 responding to a) onset; b) expansion; c) full size; d) expansion and offset; e) expansion, full size, and  
1080 offset (sustained); f) offset only; g) expansion but with inhibition. Top: Average population response.  
1081 Scale bar indicates z-score of 2.

1082

1083

1084

1085

|                                                                  |                                    | Parabigeminal nucleus |               |    |       |          |       | Shared |       |            | Pulvinar   |       |     |    |        |       |  |  |  |  |
|------------------------------------------------------------------|------------------------------------|-----------------------|---------------|----|-------|----------|-------|--------|-------|------------|------------|-------|-----|----|--------|-------|--|--|--|--|
|                                                                  |                                    |                       |               |    |       |          |       |        |       |            |            |       |     |    |        |       |  |  |  |  |
| Anatomy                                                          | Cluster #                          | 1                     | 2             | 3  | 4     | 7        | 11a   | 12     | 5     | 9a         | 9b         | 6     | 8   | 10 | 11b    |       |  |  |  |  |
|                                                                  | Marker                             | cart                  |               |    | smi32 |          | smi32 |        |       | smi32      | smi32      | smi32 |     |    |        | smi32 |  |  |  |  |
| Putative functional type (our data Figure 5 / Baden et al. 2016) | i sOFFa (G <sub>5a</sub> )         |                       |               |    |       |          |       |        |       |            |            |       |     |    |        |       |  |  |  |  |
|                                                                  | ii sOFFa (G <sub>5b</sub> )        |                       |               |    |       |          |       |        |       |            |            |       |     |    |        |       |  |  |  |  |
|                                                                  | iii tOFFa (G <sub>8a</sub> )       |                       |               |    |       |          |       |        |       |            |            |       |     |    |        |       |  |  |  |  |
|                                                                  | iv tOFFa (G <sub>8b</sub> )        |                       |               |    |       |          |       |        |       |            |            |       |     |    |        |       |  |  |  |  |
|                                                                  | v OFF slow (G <sub>4</sub> )       |                       |               |    |       |          |       |        |       |            |            |       |     |    |        |       |  |  |  |  |
|                                                                  | vi local (G <sub>10/14</sub> )     |                       |               |    |       |          |       |        |       |            |            |       |     |    |        |       |  |  |  |  |
|                                                                  | vii ON step (G <sub>15</sub> )     |                       |               |    |       |          |       |        |       |            |            |       |     |    |        |       |  |  |  |  |
|                                                                  | viii tON (G <sub>18/19</sub> )     |                       |               |    |       |          |       |        |       |            |            |       |     |    |        |       |  |  |  |  |
|                                                                  | ix ON low freq (G <sub>21</sub> )  |                       |               |    |       |          |       |        |       |            |            |       |     |    |        |       |  |  |  |  |
|                                                                  | x ON sust (G <sub>22/23</sub> )    |                       |               |    |       |          |       |        |       |            |            |       |     |    |        |       |  |  |  |  |
|                                                                  | xi sONa (G <sub>24</sub> )         |                       |               |    |       |          |       |        |       |            |            |       |     |    |        |       |  |  |  |  |
|                                                                  | xii ON con supp (G <sub>28</sub> ) |                       |               |    |       |          |       |        |       |            |            |       |     |    |        |       |  |  |  |  |
| Putative anatomical types                                        | Sümbül et al. 2014                 | D                     | V             | C  |       | X        |       | Z      | U     | F          | F          | X     | E   |    |        |       |  |  |  |  |
|                                                                  | Dhande et al. 2015                 | onoff-DS              | M3            | M2 | sONa  |          | W7B   | W7B    | on-DS | tOFFa, W7A | tOFFa, W7A |       | W3  |    |        | W7B   |  |  |  |  |
|                                                                  | Farrow et al. 2013                 | PV0                   |               |    | PV1   |          | PV6   |        |       | PV5        | PV5        | PV2   | PV3 |    |        | PV6   |  |  |  |  |
|                                                                  | Nath & Schwartz 2016               |                       | ON-OS         |    |       |          |       |        |       |            |            |       |     |    |        |       |  |  |  |  |
|                                                                  | Völggyi et al. 2009                |                       |               | G1 |       | G5       |       | G7     | G10   |            |            |       |     | G8 |        |       |  |  |  |  |
|                                                                  | Krieger et al. 2017                |                       |               |    |       |          |       |        |       |            |            | tONa  |     |    |        |       |  |  |  |  |
|                                                                  | Nath & Schwartz 2017               |                       |               |    |       |          |       |        |       |            |            |       |     |    | OFF-OS |       |  |  |  |  |
|                                                                  | Jacoby et al. 2015                 |                       | Sup by contr. |    |       |          |       |        |       |            |            |       |     |    |        |       |  |  |  |  |
|                                                                  | Tien et al. 2016                   |                       | Sup by contr. |    |       |          |       |        |       |            |            |       |     |    |        |       |  |  |  |  |
|                                                                  | Jacoby et al. 2017                 |                       |               |    |       | HD1, HD2 |       |        |       |            |            |       |     |    |        |       |  |  |  |  |
| Bae et al. 2018                                                  | 7id/ir/iv/o                        | 82wi                  | 8n, 9n        | 8w | 5so   | 1wt      | 1ni   |        | 4ow   | 4ow        | 6sw        | 5l    | 2an |    | 1wt    |       |  |  |  |  |

1086 **Table S1 related to Figure 7: Putative retinal ganglion cell types of the colliculo-pulvinar and**  
1087 **colliculo-parabigeminal circuit.** Columns consist of anatomically identified cell types. Molecular  
1088 markers, putative corresponding physiological clusters from our recordings, and putative anatomical cell  
1089 types from the literature are given for each cluster. The pairing of anatomical and functional clusters is  
1090 based on anatomy (red), molecular identity (orange), functional properties (blue) or a combination of  
1091 those. The most likely putative anatomical types are highlighted in bold. <sup>1</sup>Sümbül et al. 2014; <sup>2</sup>Dhande et  
1092 al. 2015; <sup>3</sup>Farrow et al. 2013; <sup>4</sup>Baden et al. 2016; <sup>5</sup>Nath & Schwartz et al. 2016; <sup>6</sup>Vöglyi et al. 2009;  
1093 <sup>7</sup>Krieger et al. 2017; <sup>8</sup>Nath & Schwartz 2017  
1094
